# Supplementary material for: A Population-Based Outcome-Wide Association Study of the Comorbidities and Sequelae Following COVID-19 Infection
Source: Springer Nature journal article supplement (doi:10.1007/s44197-023-00161-w), 2023-10-27
Supplement: 44197_2023_161_MOESM1_ESM.pdf [file 44197_2023_161_MOESM1_ESM.pdf]

## Supplementary Information

### A population-based outcome-wide association study of the comorbidities and sequelae following COVID-19 infection

Yuyang Zhang<sup>1</sup>#, Junhong Li<sup>1</sup>#, Lan Feng<sup>1</sup>#, Yaxin Luo<sup>2</sup>, Wendu Pang<sup>1</sup>, Ke Qiu<sup>1</sup>, Minzi Mao<sup>1</sup>, Yao Song<sup>1</sup>, Danni Cheng<sup>1</sup>, Yufang Rao<sup>1</sup>, Xinyi Wang<sup>1</sup>, Yao Hu<sup>3</sup>, Zhiye Ying<sup>3</sup>, Xiaobin Pu<sup>4</sup>, Shuyan Lin<sup>1</sup>, Shaohui Huang<sup>5</sup>, Geoffrey Liu<sup>6</sup>, Wei Zhang<sup>3</sup>, Wei Xu<sup>7</sup>\*, Yu Zhao<sup>1,3</sup>\*, Jianjun Ren<sup>1,3,4</sup>\*

<sup>1</sup> Department of Otolaryngology-Head & Neck Surgery, West China Hospital, Sichuan University, Chengdu, China

<sup>2</sup> Department of Epidemiology and Biostatistics, West China School of Public Health and West China Fourth Hospital, Sichuan University, Chengdu, China

<sup>3</sup> West China Biomedical Big Data Center, West China Hospital, Sichuan University, Chengdu, China

<sup>4</sup> Department of Oto-Rhino-Laryngology, Langzhong People's Hospital, Langzhong, China

<sup>5</sup> Department of Radiation Oncology, Princess Margaret Cancer Centre and University of Toronto, Toronto, Canada

<sup>6</sup> Department of Medicine, Division of Medical Oncology and Hematology, Princess Margaret Cancer Center, University Health Network, University of Toronto, Toronto, Canada

<sup>7</sup> Department of Biostatistics, Princess Margaret Cancer Centre and Dalla Lana School of Public Health, Toronto, Ontario, Canada

#These authors contributed equally to this work

#### \* Corresponding author:

Jianjun Ren, Department of Otolaryngology-Head & Neck Surgery, and West China Biomedical Big Data Center, West China Hospital, Sichuan University, Chengdu, China; Email: [Jianjun.Ren@scu.edu.cn](mailto:Jianjun.Ren@scu.edu.cn)

Wei Xu, Department of Biostatistics, Princess Margaret Cancer Centre, 10-511, 610 University Avenue Toronto, Toronto, Ontario, Canada; Email: [Wei.Xu@uhnresearch.ca](mailto:Wei.Xu@uhnresearch.ca)

Yu Zhao, Department of Otolaryngology-Head & Neck Surgery, West China Hospital, Sichuan University, Chengdu, China, Email: [yuzhao@wchscu.edu.cn](mailto:yuzhao@wchscu.edu.cn)

## Table of contents

|                                                                                                                                                                                                                                                 |    |
|-------------------------------------------------------------------------------------------------------------------------------------------------------------------------------------------------------------------------------------------------|----|
| Supplementary Table 1: Comorbidity categories and corresponding ICD-10 codes.....                                                                                                                                                               | 3  |
| Supplementary Table 2: Sequela categories and corresponding ICD-10 codes.....                                                                                                                                                                   | 4  |
| Supplementary Table 3: ICD-10 codes and Charlson Comorbidity Index (CCI) scores.....                                                                                                                                                            | 5  |
| Supplementary Table 4: Characteristics of COVID-19-positive and negative patients.....                                                                                                                                                          | 6  |
| Supplementary Table 5: The outcome-wide association analyses evaluating the hazards ratio (HR) for comorbidities (defined by three-digit ICD-10 codes) of COVID-19-positive participants compared to matched COVID-19-negative individuals..... | 7  |
| Supplementary Table 6: Adjusted risk of death for COVID-19-positive participants compared with matched COVID-19-negative comparisons.....                                                                                                       | 9  |
| Supplementary Table 7: Characteristics of mild (non-hospitalized) and severe (hospitalized) COVID-19 patients.....                                                                                                                              | 10 |
| Supplementary Table 8: Adjusted hazards ratios (HRs) of clinical comorbidities for severe COVID-19 patients (hospitalized) compared with mild COVID-19 patients (non-hospitalized).....                                                         | 11 |
| Supplementary Table 9: The adjusted risk of clinical comorbidity in COVID-19-positive participants compared with matched COVID-19-negative participants in females and males, respectively.....                                                 | 12 |
| Supplementary Table 10: The adjusted risk of clinical comorbidity in COVID-19-positive participants compared with matched COVID-19-negative participants stratified by BMI.....                                                                 | 13 |
| Supplementary Table 11: The adjusted risk of clinical comorbidity in COVID-19-positive participants compared with matched COVID-19-negative participants stratified by smoking status.....                                                      | 14 |
| Supplementary Table 12: The adjusted risk of clinical comorbidity in COVID-19-positive participants compared with matched COVID-19-negative participants stratified by CCI score.....                                                           | 15 |
| Supplementary Table 13: The outcome-wide association analyses evaluating the hazards ratio (HR) for sequelae (defined by three-digit ICD-10 codes) of COVID-19-positive participants compared to matched COVID-19-negative participants.....    | 16 |
| Supplementary Table 14: Adjusted hazards ratios (HRs) of sequelae of COVID-19-positive participants compared with matched COVID-19-negative participants.....                                                                                   | 17 |
| Supplementary Figure 1: Flowchart of the study design.....                                                                                                                                                                                      | 18 |
| Supplementary Figure 2: The absolute standardized mean difference in all patients and matched patients.....                                                                                                                                     | 19 |
| Supplementary Figure 3: The distribution of (A) all, (B) mild (non-hospitalized), and (C) severe (hospitalized) COVID-19 patients with different numbers of comorbidities, respectively.....                                                    | 20 |
| Supplementary Figure 4: The proportion of COVID-19-positive participants with different comorbidities, stratified by age, sex, BMI, smoking status, CCI and severity, respectively.....                                                         | 21 |

**Supplementary Table 1: Comorbidity categories and corresponding ICD-10 codes.**

| Comorbidity category               | ICD-10 codes                                                    |
|------------------------------------|-----------------------------------------------------------------|
| Gastroenteritis and colitis        | A099                                                            |
| Septicaemia                        | A415, A419                                                      |
| Infectious diseases                | B370, B956, B962, B968                                          |
| Blood cell disease                 | D509, D649, D696                                                |
| Diabetes mellitus                  | E119                                                            |
| Hypoglycaemia                      | E162                                                            |
| Vitamin deficiency                 | E538, E559                                                      |
| Obesity                            | E668, E669                                                      |
| Hypercholesterolaemia              | E780                                                            |
| Electrolyte imbalance              | E833, E834, E835, E86, E870, E871, E872, E873, E875, E876, E877 |
| Dementia                           | F019, F03                                                       |
| Delirium                           | F050, F051, F058, F059                                          |
| Mental disease                     | F171, F329, F419                                                |
| Sleep apnoea                       | G473                                                            |
| Hearing loss                       | H919                                                            |
| Hypertension                       | I10                                                             |
| Chronic ischaemic heart disease    | I252, I259                                                      |
| Pulmonary embolism                 | I269                                                            |
| Other heart disease                | I340, I350, I447, I451, I480, I489, I500, I509, I517, I518      |
| Cerebrovascular diseases           | I678                                                            |
| Vascular disease                   | I739, I802                                                      |
| Hypotension                        | I951, I959                                                      |
| Lower respiratory infection        | J128, J181, J189, J22, J690                                     |
| COPD/Emphysema                     | J439, J440                                                      |
| Asthma                             | J459                                                            |
| Other lung disease                 | J47, J841, J981                                                 |
| Pleural effusion                   | J90                                                             |
| Respiratory failure                | J9600, J9690, J9691                                             |
| Gastro-oesophageal reflux disease  | K219                                                            |
| Diverticular disease of intestine  | K579                                                            |
| Fecal abnormalities                | K590, R15, R195                                                 |
| Fatty liver                        | K760                                                            |
| Cellulitis                         | L031                                                            |
| Rash and dermatitis                | L248, R21                                                       |
| Decubitus ulcer                    | L890, L891, L899                                                |
| Gout                               | M109                                                            |
| Osteoarthritis                     | M199, M549, M819                                                |
| Renal failure                      | N179, N183, N189                                                |
| Urinary tract infection            | N390                                                            |
| Hyperplasia of prostate            | N40                                                             |
| Arrhythmia                         | R000, R001                                                      |
| Cough                              | R05                                                             |
| Dyspnea and asphyxia               | R060, R090                                                      |
| Nausea and vomiting                | R11                                                             |
| Abnormalities of gait and mobility | R263, R268, R296                                                |
| Urinary abnormality                | R31, R32, R33                                                   |
| Disorientation                     | R410                                                            |
| Other cognitive symptoms           | R418                                                            |
| Emotional state symptoms and signs | R451, R458                                                      |
| General symptoms and signs         | R509, R51, R53, R55, R568, R600, R630, R638                     |
| Abnormal examining results         | R798, R91, R945                                                 |

ICD-10: international classification of disease, 10<sup>th</sup> revision.

**Supplementary Table 2: Sequela categories and corresponding ICD-10 codes.**

| <b>Sequela category</b>            | <b>ICD-10 codes</b> |
|------------------------------------|---------------------|
| Septicaemia                        | A419                |
| Infectious diseases                | B956, B968          |
| Delirium                           | F050, F051          |
| Lower respiratory infection        | J128, J189          |
| Interstitial pulmonary diseases    | J841                |
| Respiratory failure                | J9691               |
| Decubitus ulcer                    | L891                |
| Fecal abnormalities                | R15                 |
| Immobility                         | R263                |
| Urinary abnormality                | R32                 |
| Emotional state symptoms and signs | R458                |

ICD-10: international classification of disease, 10<sup>th</sup> revision.

**Supplementary Table 3: ICD-10 codes and Charlson Comorbidity Index (CCI) scores.**

| Comorbidities                      | Score | ICD-10 codes                                                                                                                                            |
|------------------------------------|-------|---------------------------------------------------------------------------------------------------------------------------------------------------------|
| <b>Age of the patient</b>          |       |                                                                                                                                                         |
| <50 years                          | 0     | /                                                                                                                                                       |
| 50-59 years                        | 1     | /                                                                                                                                                       |
| 60-69 years                        | 2     | /                                                                                                                                                       |
| 70-79 years                        | 3     | /                                                                                                                                                       |
| 80 years or more                   | 4     | /                                                                                                                                                       |
| <b>Myocardial infarction</b>       |       |                                                                                                                                                         |
| Yes                                | 1     | I21, I22, I252                                                                                                                                          |
| No                                 | 0     |                                                                                                                                                         |
| <b>Congestive heart failure</b>    |       |                                                                                                                                                         |
| Yes                                | 1     | I50                                                                                                                                                     |
| No                                 | 0     |                                                                                                                                                         |
| <b>Peripheral vascular disease</b> |       |                                                                                                                                                         |
| Yes                                | 1     | I71, I790, I739, R02, Z958, Z959                                                                                                                        |
| No                                 | 0     |                                                                                                                                                         |
| <b>Cerebrovascular disease</b>     |       |                                                                                                                                                         |
| Yes                                | 1     | G450, G451, G452, G454, G458, G459, G46, I60, I61, I62, I63, I65, I66, I64, I670, I671, I672, I674, I675, I676, I677, I678, I679, I681, I682, I688, I69 |
| No                                 | 0     |                                                                                                                                                         |
| <b>Dementia</b>                    |       |                                                                                                                                                         |
| Yes                                | 1     | F00, F01, F02, F051                                                                                                                                     |
| No                                 | 0     |                                                                                                                                                         |
| <b>Chronic pulmonary disease</b>   |       |                                                                                                                                                         |
| Yes                                | 1     | J40, J41, J42, J43, J44, J45, J46, J47, J67, J60, J61, J62, J63, J66, J64, J65                                                                          |
| No                                 | 0     |                                                                                                                                                         |
| <b>Rheumatologic disease</b>       |       |                                                                                                                                                         |
| Yes                                | 1     | M32, M34, M332, M053, M058, M059, M060, M063, M069, M050, M052, M051, M353                                                                              |
| No                                 | 0     |                                                                                                                                                         |
| <b>Peptic ulcer disease</b>        |       |                                                                                                                                                         |
| Yes                                | 1     | K25, K26, K27, K28                                                                                                                                      |
| No                                 | 0     |                                                                                                                                                         |
| <b>Diabetes</b>                    |       |                                                                                                                                                         |
| Yes, no complications              | 1     | E109, E119, E139, E149, E101, E111, E131, E141, E105, E115, E135, E145                                                                                  |
| Yes, with chronic complications    | 2     | E102, E112, E132, E142, E103, E113, E133, E143, E104, E114, E134, E144                                                                                  |
| No                                 | 0     |                                                                                                                                                         |
| <b>Hemiplegia or paraplegia</b>    |       |                                                                                                                                                         |
| Yes                                | 2     | G041, G81, G820, G821, G822                                                                                                                             |
| No                                 | 0     |                                                                                                                                                         |
| <b>Renal disease</b>               |       |                                                                                                                                                         |
| Yes                                | 2     | N03, N052, N053, N054, N055, N056, N072, N073, N074, N01, N18, N19, N25                                                                                 |
| No                                 | 0     |                                                                                                                                                         |
| <b>Malignancy</b>                  |       |                                                                                                                                                         |
| Localized solid tumor              | 2     | C0, C1, C2, C3, C40, C41, C43, C45, C46, C47, C48, C49, C5, C6, C70, C71, C72, C73, C74, C75, C76, C883, C887, C889, C900, C901, C96                    |
| Metastatic solid tumor             | 6     | C77, C78, C79, C80                                                                                                                                      |
| No                                 | 0     |                                                                                                                                                         |
| <b>Leukemia</b>                    |       |                                                                                                                                                         |
| Yes                                | 2     | C91, C92, C93, C94, C95                                                                                                                                 |
| No                                 | 0     |                                                                                                                                                         |
| <b>Lymphoma</b>                    |       |                                                                                                                                                         |
| Yes                                | 2     | C81, C82, C83, C84, C85, C86, C884                                                                                                                      |
| No                                 | 0     |                                                                                                                                                         |
| <b>AIDS</b>                        |       |                                                                                                                                                         |
| Yes                                | 6     | B20, B21, B22, B23, B24                                                                                                                                 |
| No                                 | 0     |                                                                                                                                                         |
| <b>Liver disease</b>               |       |                                                                                                                                                         |
| Mild liver disease                 | 1     | K702, K703, K73, K717, K740, K742, K746, K743, K744, K745                                                                                               |
| Moderate or severe liver disease   | 3     | K729, K766, K767, K721                                                                                                                                  |
| No                                 | 0     |                                                                                                                                                         |

ICD-10: international classification of disease, 10<sup>th</sup> revision.

**Supplementary Table 4: Characteristics of COVID-19-positive and negative patients.**

| Covariant                 |                 | Total population<br>(n=75057) | COVID-19-negative participants<br>(n=58281) | COVID-19-positive participants<br>(n=16776) | p value          |
|---------------------------|-----------------|-------------------------------|---------------------------------------------|---------------------------------------------|------------------|
| <b>Sex (%)</b>            | Female/Male     | 53.5/46.5                     | 53.7/46.3                                   | 52.8/47.2                                   | 0.054            |
| <b>Age</b>                | Mean(SD)        | 65.5(8.3)                     | 65.8(8.2)                                   | 64.6(8.6)                                   | <b>&lt;0.001</b> |
|                           | Median[Min,Max] | 65.4[49.4, 85.2]              | 65.8[49.4, 85.2]                            | 63.7[49.5, 82.9]                            |                  |
| <b>TDI</b>                | Mean(SD)        | -0.9(3.3)                     | -0.9(3.3)                                   | -0.7(3.3)                                   | <b>&lt;0.001</b> |
|                           | Median[Min,Max] | -1.7[-6.3, 10.8]              | -1.8[-6.3, 10.8]                            | -1.5[-6.3, 10.6]                            |                  |
| <b>Ethnicity (%)</b>      | White/Non-white | 93/7                          | 93.8/6.2                                    | 90/10                                       | <b>&lt;0.001</b> |
|                           | Missing         | N=440                         | N=339                                       | N=101                                       |                  |
| <b>BMI (%)</b>            | Normal          | 29.1                          | 30.1                                        | 25.5                                        | <b>&lt;0.001</b> |
|                           | Obese           | 28.2                          | 27.2                                        | 31.8                                        |                  |
|                           | Overweight      | 42.2                          | 42.2                                        | 42.4                                        |                  |
|                           | Underweight     | 0.5                           | 0.5                                         | 0.4                                         |                  |
|                           | Missing         | N=548                         | N=404                                       | N=144                                       |                  |
| <b>Smoking status (%)</b> | Never           | 53.4                          | 53.6                                        | 52.9                                        | 0.059            |
|                           | Current         | 11.8                          | 11.9                                        | 11.6                                        |                  |
|                           | Previous        | 34.7                          | 34.5                                        | 35.5                                        |                  |
|                           | Missing         | N=519                         | N=410                                       | N=109                                       |                  |
| <b>CCI score</b>          | Mean(SD)        | 1.3(2.1)                      | 1.3(2.1)                                    | 1.2(2.2)                                    | <b>0.003</b>     |
|                           | Median[Min,Max] | 0[0, 19]                      | 0[0, 19]                                    | 0[0, 19]                                    |                  |

COVID-19: corona virus disease 2019; TDI: Townsend deprivation index; BMI: body mass index; SD: standard deviation; CCI: Charlson Comorbidity index. Bold indicates p values less than 0.05.

Supplementary Table 5: The outcome-wide association analyses evaluating the hazards ratio (HR) for comorbidities (defined by three-digit ICD-10 codes) of COVID-19-positive participants compared to matched COVID-19-negative individuals.

| ICD-10 code | COVID-19-negative         |          | COVID-19-positive         |          | HR(95%CI)                | p value | ICD-10 disease                                                                         | Category                          |
|-------------|---------------------------|----------|---------------------------|----------|--------------------------|---------|----------------------------------------------------------------------------------------|-----------------------------------|
|             | No. negative participants | No. case | No. positive participants | No. case |                          |         |                                                                                        |                                   |
| A099        | 55405                     | 52       | 15963                     | 105      | 7.38(5.25-10.38)         | <0.001  | Gastroenteritis and colitis of unspecified origin                                      | Gastroenteritis and colitis       |
| A415        | 57991                     | 4        | 16654                     | 13       | 12.4(4.04-38.06)         | <0.001  | Septicaemia due to other Gram-negative organisms                                       | Septicaemia                       |
| A419        | 56948                     | 28       | 16261                     | 55       | 8.04(5-12.91)            | <0.001  | Septicaemia, unspecified                                                               |                                   |
| B370        | 57968                     | 6        | 16634                     | 34       | 21.48(9.01-51.22)        | <0.001  | Candidal stomatitis                                                                    | Infectious diseases               |
| B956        | 57621                     | 12       | 16585                     | 11       | 3.19(1.4-7.27)           | 0.006   | Staphylococcus aureus as the cause of diseases classified to other chapters            |                                   |
| B962        | 57180                     | 18       | 16338                     | 27       | 6.27(3.38-11.66)         | <0.001  | Escherichia coli [E. coli] as the cause of diseases classified to other chapters       |                                   |
| B968        | 57102                     | 8        | 16379                     | 23       | 11.62(4.97-27.15)        | <0.001  | Other specified bacterial agents as the cause of diseases classified to other chapters |                                   |
| D509        | 55644                     | 45       | 16085                     | 24       | 2.18(1.3-3.66)           | 0.003   | Iron deficiency anaemia, unspecified                                                   | Blood cell disease                |
| D649        | 54425                     | 63       | 15664                     | 49       | 2.88(1.96-4.22)          | <0.001  | Anaemia, unspecified                                                                   |                                   |
| D696        | 57866                     | 9        | 16635                     | 26       | 10.77(5.04-23.02)        | <0.001  | Thrombocytopenia, unspecified                                                          |                                   |
| E119        | 52643                     | 66       | 14897                     | 76       | 4.24(2.98-6.01)          | <0.001  | Non-insulin-dependent diabetes mellitus with renal complications                       | Diabetes mellitus                 |
| E162        | 57822                     | 16       | 16595                     | 36       | 8.25(4.57-14.89)         | <0.001  | Hypoglycaemia, unspecified                                                             | Hypoglycaemia                     |
| E538        | 57789                     | 9        | 16571                     | 14       | 6.74(2.83-16.08)         | <0.001  | Deficiency of other specified B group vitamins                                         | Vitamin deficiency                |
| E559        | 57402                     | 27       | 16484                     | 45       | 6.36(3.89-10.39)         | <0.001  | Vitamin D deficiency, unspecified                                                      |                                   |
| E668        | 57408                     | 16       | 16520                     | 15       | 3.46(1.68-7.11)          | <0.001  | Other obesity                                                                          | Obesity                           |
| E669        | 52782                     | 114      | 15132                     | 88       | 2.7(2.02-3.61)           | <0.001  | Obesity, unspecified                                                                   |                                   |
| E780        | 48823                     | 119      | 14049                     | 92       | 3.21(2.38-4.32)          | <0.001  | Pure hypercholesterolaemia                                                             | Hypercholesterolaemia             |
| E833        | 58055                     | 14       | 16685                     | 32       | 10.28(5.29-19.97)        | <0.001  | Disorders of phosphorus metabolism                                                     | Electrolyte imbalance             |
| E834        | 57900                     | 25       | 16617                     | 32       | 5.39(3.13-9.3)           | <0.001  | Disorders of magnesium metabolism                                                      |                                   |
| E835        | 57776                     | 23       | 16567                     | 30       | 4.84(2.81-8.36)          | <0.001  | Disorders of calcium metabolism                                                        |                                   |
| E86         | 57024                     | 35       | 16261                     | 129      | 15.33(10.35-22.7)        | <0.001  | Volume depletion                                                                       |                                   |
| E870        | 58153                     | 6        | 16656                     | 55       | 35.28(15.18-81.97)       | <0.001  | Hyperosmolality and hypernatraemia                                                     |                                   |
| E871        | 57230                     | 31       | 16399                     | 73       | 9.9(6.36-15.4)           | <0.001  | Hypo-osmolality and hyponatraemia                                                      |                                   |
| E872        | 57871                     | 22       | 16605                     | 44       | 7.62(4.52-12.84)         | <0.001  | Acidosis                                                                               |                                   |
| E873        | 58200                     | 3        | 16716                     | 23       | 27.26(8.16-91.09)        | <0.001  | Alkalosis                                                                              |                                   |
| E875        | 57860                     | 15       | 16594                     | 38       | 9.39(5.15-17.1)          | <0.001  | Hyperkalaemia                                                                          |                                   |
| E876        | 57344                     | 37       | 16394                     | 82       | 8.97(5.98-13.46)         | <0.001  | Hypokalaemia                                                                           |                                   |
| E877        | 57927                     | 23       | 16609                     | 20       | 3.31(1.8-6.09)           | <0.001  | Fluid overload                                                                         |                                   |
| F019        | 58143                     | 5        | 16598                     | 16       | 12.64(4.63-34.51)        | <0.001  | Vascular dementia, unspecified                                                         | Dementia                          |
| F03         | 57935                     | 15       | 16433                     | 28       | 8.77(4.46-17.27)         | <0.001  | Unspecified dementia                                                                   |                                   |
| F050        | 58191                     | 4        | 16679                     | 27       | 25.88(9.05-74)           | <0.001  | Delirium not superimposed on dementia, so described                                    | Delirium                          |
| F051        | 58186                     | 7        | 16637                     | 33       | 21.56(9.03-51.47)        | <0.001  | Delirium superimposed on dementia                                                      |                                   |
| F058        | 58200                     | 4        | 16702                     | 21       | 20.78(7.13-60.55)        | <0.001  | Other delirium                                                                         |                                   |
| F059        | 57744                     | 23       | 16411                     | 86       | 15.31(9.49-24.7)         | <0.001  | Delirium, unspecified                                                                  |                                   |
| F171        | 54579                     | 34       | 15855                     | 19       | 2.09(1.16-3.77)          | 0.014   | Harmful use due to use of tobacco                                                      | Mental disease                    |
| F329        | 53468                     | 67       | 15408                     | 48       | 2.44(1.66-3.58)          | <0.001  | Depressive episode, unspecified                                                        |                                   |
| F419        | 55448                     | 80       | 15979                     | 46       | 2.02(1.39-2.93)          | <0.001  | Anxiety disorder, unspecified                                                          |                                   |
| G473        | 56518                     | 18       | 16336                     | 17       | 3.22(1.63-6.35)          | <0.001  | Sleep apnoea                                                                           | Sleep apnoea                      |
| H919        | 56811                     | 34       | 16385                     | 17       | 1.89(1.05-3.42)          | 0.034   | Hearing loss, unspecified                                                              | Hearing loss                      |
| I10         | 38523                     | 218      | 11404                     | 142      | 2.69(2.09-3.45)          | <0.001  | Essential (primary) hypertension                                                       | Hypertension                      |
| I252        | 55533                     | 45       | 15993                     | 22       | 2.02(1.19-3.43)          | 0.009   | Old myocardial infarction                                                              | Chronic ischaemic heart disease   |
| I259        | 54256                     | 66       | 15673                     | 48       | 2.64(1.8-3.86)           | <0.001  | Chronic ischaemic heart disease, unspecified                                           |                                   |
| I269        | 57289                     | 43       | 16496                     | 112      | 11.27(7.74-16.43)        | <0.001  | Pulmonary embolism without mention of acute cor pulmonale                              | Pulmonary embolism                |
| I340        | 57416                     | 22       | 16560                     | 16       | 2.83(1.47-5.43)          | 0.002   | Mitral (valve) insufficiency                                                           | Other heart disease               |
| I350        | 57553                     | 14       | 16565                     | 14       | 4(1.88-8.52)             | <0.001  | Aortic (valve) stenosis                                                                |                                   |
| I447        | 57569                     | 21       | 16559                     | 17       | 3.05(1.59-5.84)          | <0.001  | Left bundle-branch block, unspecified                                                  |                                   |
| I451        | 57495                     | 31       | 16532                     | 17       | 2.52(1.36-4.68)          | 0.003   | Other and unspecified right bundle-branch block                                        |                                   |
| I480        | 57145                     | 35       | 16495                     | 22       | 2.34(1.37-4.02)          | 0.002   | Paroxysmal atrial fibrillation                                                         |                                   |
| I489        | 54930                     | 100      | 15785                     | 96       | 4.07(3.03-5.47)          | <0.001  | Atrial fibrillation and atrial flutter, unspecified                                    |                                   |
| I500        | 57442                     | 24       | 16411                     | 27       | 4.96(2.81-8.79)          | <0.001  | Congestive heart failure                                                               |                                   |
| I509        | 57394                     | 32       | 16447                     | 30       | 3.88(2.33-6.47)          | <0.001  | Heart failure, unspecified                                                             |                                   |
| I517        | 56868                     | 47       | 16329                     | 36       | 3.2(2.03-5.03)           | <0.001  | Cardiomegaly                                                                           |                                   |
| I518        | 57389                     | 29       | 16458                     | 22       | 2.84(1.62-4.97)          | <0.001  | Other ill-defined heart diseases                                                       |                                   |
| I678        | 57595                     | 39       | 16434                     | 19       | 1.89(1.08-3.3)           | 0.026   | Other specified cerebrovascular diseases                                               | Cerebrovascular diseases          |
| I739        | 57447                     | 12       | 16511                     | 12       | 3.71(1.63-8.45)          | 0.002   | Peripheral vascular disease, unspecified                                               | Vascular disease                  |
| I802        | 57544                     | 11       | 16544                     | 14       | 5.47(2.43-12.32)         | <0.001  | Phlebitis and thrombophlebitis of other deep vessels of lower extremities              | Hypotension                       |
| I951        | 57466                     | 26       | 16424                     | 28       | 4.79(2.74-8.39)          | <0.001  | Orthostatic hypotension                                                                |                                   |
| I959        | 56751                     | 38       | 16256                     | 85       | 8.53(5.77-12.62)         | <0.001  | Hypotension, unspecified                                                               |                                   |
| J128        | 58256                     | 3        | 15896                     | 1016     | 3714.24(522.68-26393.82) | <0.001  | Other viral pneumonia                                                                  | Lower respiratory infection       |
| J181        | 56277                     | 53       | 16023                     | 58       | 4.4(2.99-6.47)           | <0.001  | Lobar pneumonia, unspecified                                                           |                                   |
| J189        | 56903                     | 29       | 16218                     | 67       | 9.63(6.07-15.26)         | <0.001  | Pneumonia, unspecified                                                                 |                                   |
| J22         | 55911                     | 30       | 15953                     | 39       | 4.94(3.04-8.04)          | <0.001  | Unspecified acute lower respiratory infection                                          |                                   |
| J690        | 58042                     | 7        | 16633                     | 23       | 12.08(5.17-28.22)        | <0.001  | Pneumonitis due to food and vomit                                                      | COPD/Emphysema                    |
| J439        | 57683                     | 16       | 16576                     | 25       | 5.82(3.1-10.92)          | <0.001  | Emphysema, unspecified                                                                 |                                   |
| J440        | 57439                     | 9        | 16391                     | 70       | 29.18(14.57-58.45)       | <0.001  | Chronic obstructive pulmonary disease with acute lower respiratory infection           |                                   |
| J459        | 51511                     | 67       | 14821                     | 46       | 2.44(1.64-3.61)          | <0.001  | Asthma, unspecified                                                                    | Asthma                            |
| J47         | 57525                     | 19       | 16569                     | 21       | 4.4(2.34-8.27)           | <0.001  | Bronchiectasis                                                                         | Other lung disease                |
| J841        | 57975                     | 10       | 16658                     | 23       | 10.88(4.86-24.37)        | <0.001  | Other interstitial pulmonary diseases with fibrosis                                    |                                   |
| J981        | 57085                     | 37       | 16368                     | 43       | 4.62(2.94-7.25)          | <0.001  | Pulmonary collapse                                                                     | Pleural effusion                  |
| J90         | 56560                     | 61       | 16194                     | 50       | 3.51(2.37-5.19)          | <0.001  | Pleural effusion, not elsewhere classified                                             |                                   |
| J9600       | 58246                     | 2        | 16703                     | 45       | 81.26(19.69-335.32)      | <0.001  | Acute respiratory failure; Type I [hypoxic]                                            | Respiratory failure               |
| J9690       | 58037                     | 8        | 16497                     | 275      | 123.04(60.9-248.59)      | <0.001  | Respiratory failure, unspecified; Type I [hypoxic]                                     |                                   |
| J9691       | 58112                     | 7        | 16684                     | 25       | 13.34(5.76-30.88)        | <0.001  | Respiratory failure unspecified; Type II [hypercapnic]                                 |                                   |
| K219        | 51996                     | 105      | 15210                     | 65       | 2.32(1.68-3.2)           | <0.001  | Gastro-oesophageal reflux disease without oesophagitis                                 | Gastro-oesophageal reflux disease |
| K579        | 55837                     | 63       | 16110                     | 38       | 2.54(1.68-3.86)          | <0.001  | Diverticular disease of intestine, part unspecified, without perforation or abscess    | Diverticular disease of intestine |

|      |       |     |       |     |                    |        |                                                                                              |                                    |
|------|-------|-----|-------|-----|--------------------|--------|----------------------------------------------------------------------------------------------|------------------------------------|
| K590 | 54181 | 67  | 15477 | 86  | 4.81(3.46-6.69)    | <0.001 | Constipation                                                                                 |                                    |
| R15  | 57641 | 12  | 16494 | 16  | 4.93(2.32-10.45)   | <0.001 | Faecal incontinence                                                                          | Fecal abnormalities                |
| R195 | 57483 | 25  | 16573 | 16  | 2.38(1.27-4.47)    | 0.007  | Other fecal abnormalities                                                                    |                                    |
| K760 | 57178 | 43  | 16440 | 28  | 2.17(1.34-3.52)    | 0.002  | Fatty (change of) liver, not elsewhere classified                                            | Fatty liver                        |
| L031 | 56592 | 17  | 16167 | 12  | 2.9(1.36-6.22)     | 0.006  | Cellulitis of other parts of limb                                                            | Cellulitis                         |
| L248 | 58188 | 3   | 16730 | 21  | 27.7(8.26-92.88)   | <0.001 | Irritant contact dermatitis due to other agents                                              |                                    |
| R21  | 57643 | 8   | 16580 | 20  | 8.85(3.88-20.14)   | <0.001 | Rash and other nonspecific skin eruption                                                     | Rash and dermatitis                |
| L890 | 58211 | 5   | 16737 | 15  | 14.35(4.76-43.33)  | <0.001 | Stage I decubitus ulcer and pressure area                                                    |                                    |
| L891 | 58086 | 12  | 16618 | 37  | 14.19(7.05-28.57)  | <0.001 | Stage II decubitus ulcer                                                                     | Decubitus ulcer                    |
| L899 | 58170 | 4   | 16689 | 19  | 23.27(6.88-78.72)  | <0.001 | Decubitus ulcer and pressure area, unspecified                                               |                                    |
| M109 | 57206 | 33  | 16439 | 19  | 2.06(1.17-3.63)    | 0.013  | Gout, unspecified                                                                            | Gout                               |
| M199 | 54344 | 109 | 15666 | 83  | 3.11(2.3-4.19)     | <0.001 | Arthrosis, unspecified                                                                       |                                    |
| M549 | 56947 | 20  | 16404 | 17  | 3.46(1.78-6.73)    | <0.001 | Dorsalgia, unspecified                                                                       | Osteoarthritis                     |
| M819 | 56394 | 29  | 16270 | 26  | 3.56(2.09-6.07)    | <0.001 | Osteoporosis, unspecified                                                                    |                                    |
| N179 | 55619 | 85  | 15611 | 235 | 11.01(8.49-14.3)   | <0.001 | Acute renal failure, unspecified                                                             |                                    |
| N183 | 56635 | 45  | 16235 | 44  | 3.69(2.42-5.63)    | <0.001 | Chronic kidney disease, stage 3                                                              | Renal failure                      |
| N189 | 56918 | 29  | 16264 | 37  | 5.96(3.54-10.04)   | <0.001 | Chronic renal failure, unspecified                                                           |                                    |
| N390 | 54434 | 61  | 15389 | 68  | 4.31(3.01-6.15)    | <0.001 | Urinary tract infection, site not specified                                                  | Urinary tract infection            |
| N40  | 54705 | 73  | 15862 | 37  | 2.04(1.35-3.08)    | <0.001 | Hyperplasia of prostate                                                                      | Hyperplasia of prostate            |
| R000 | 57424 | 21  | 16504 | 29  | 6.37(3.5-11.61)    | <0.001 | Tachycardia, unspecified                                                                     |                                    |
| R001 | 57184 | 23  | 16466 | 28  | 4.67(2.65-8.24)    | <0.001 | Bradycardia, unspecified                                                                     | Arrhythmia                         |
| R05  | 57096 | 18  | 16345 | 74  | 15.34(9.04-26.03)  | <0.001 | Cough                                                                                        | Cough                              |
| R060 | 56025 | 51  | 16046 | 98  | 7.42(5.2-10.59)    | <0.001 | Dyspnea                                                                                      |                                    |
| R090 | 58191 | 1   | 16728 | 18  | 68.17(9.09-510.94) | <0.001 | Asphyxia                                                                                     | Dyspnea and asphyxia               |
| R11  | 54538 | 64  | 15772 | 43  | 2.24(1.51-3.31)    | <0.001 | Nausea and vomiting                                                                          | Nausea and vomiting                |
| R263 | 58130 | 9   | 16652 | 17  | 8.12(3.5-18.84)    | <0.001 | Immobility                                                                                   |                                    |
| R268 | 57032 | 30  | 16172 | 62  | 8.54(5.43-13.44)   | <0.001 | Other and unspecified abnormalities of gait and mobility                                     | Abnormalities of gait and mobility |
| R296 | 56792 | 61  | 15904 | 63  | 4.57(3.15-6.62)    | <0.001 | Tendency to fall involving the nervous and musculoskeletal systems, not elsewhere classified |                                    |
| R31  | 54888 | 34  | 15914 | 17  | 1.96(1.07-3.6)     | 0.030  | Unspecified haematuria                                                                       |                                    |
| R32  | 57331 | 23  | 16303 | 40  | 6.92(4.07-11.76)   | <0.001 | Unspecified urinary incontinence                                                             | Urinary abnormality                |
| R33  | 55785 | 46  | 16019 | 42  | 3.56(2.31-5.46)    | <0.001 | Retention of urine                                                                           |                                    |
| R410 | 57407 | 32  | 16297 | 48  | 5.83(3.69-9.22)    | <0.001 | Disorientation, unspecified                                                                  | Disorientation                     |
| R418 | 57933 | 11  | 16584 | 15  | 5.04(2.31-11)      | <0.001 | Other and unspecified symptoms and signs involving cognitive functions and awareness         | Other cognitive symptoms           |
| R451 | 58165 | 6   | 16703 | 19  | 10.99(4.36-27.67)  | <0.001 | Restlessness and agitation                                                                   |                                    |
| R458 | 58026 | 8   | 16684 | 15  | 7.66(3.1-18.9)     | <0.001 | Other symptoms and signs involving emotional state                                           | Emotional state symptoms and signs |
| R509 | 57020 | 21  | 16364 | 61  | 10.21(6.21-16.79)  | <0.001 | Fever, unspecified                                                                           |                                    |
| R51  | 55732 | 34  | 16071 | 19  | 2.06(1.16-3.67)    | 0.014  | Headache                                                                                     |                                    |
| R53  | 57078 | 25  | 16336 | 71  | 10.6(6.66-16.86)   | <0.001 | Malaise and fatigue                                                                          |                                    |
| R55  | 55477 | 43  | 15938 | 22  | 2.02(1.19-3.45)    | 0.009  | Syncope and collapse                                                                         |                                    |
| R568 | 57664 | 11  | 16551 | 10  | 3.33(1.41-7.87)    | 0.006  | Other and unspecified convulsions                                                            | General symptoms and signs         |
| R600 | 57655 | 14  | 16547 | 24  | 6.46(3.33-12.5)    | <0.001 | Localised oedema                                                                             |                                    |
| R630 | 57951 | 11  | 16658 | 19  | 6.34(3.01-13.35)   | <0.001 | Anorexia                                                                                     |                                    |
| R638 | 58113 | 14  | 16669 | 27  | 8.03(4.14-15.57)   | <0.001 | Other symptoms and signs concerning food and fluid intake                                    |                                    |
| R798 | 56138 | 49  | 16176 | 34  | 2.39(1.54-3.71)    | <0.001 | Other specified abnormal findings of blood chemistry                                         |                                    |
| R91  | 57506 | 21  | 16533 | 16  | 2.98(1.54-5.75)    | 0.001  | Abnormal findings on diagnostic imaging of lung                                              | Abnormal examing results           |
| R945 | 57035 | 31  | 16364 | 75  | 9.37(6.1-14.41)    | <0.001 | Abnormal results of liver function studies                                                   |                                    |

ICD-10: international classification of disease 10<sup>th</sup> revision; COVID-19, corona virus disease 2019; CI: confidence interval. Bold indicates p values less than 0.05.



**Supplementary Table 6: Adjusted risk of death for COVID-19-positive participants compared with matched COVID-19-negative comparisons.**

| <b>All COVID-19 patients compared with matched negative patients</b>    |               |                   |                   |                    |                  |
|-------------------------------------------------------------------------|---------------|-------------------|-------------------|--------------------|------------------|
| <b>Test result</b>                                                      | <b>Number</b> | <b>Death case</b> | <b>Death rate</b> | <b>HR(95% CI)</b>  | <b>P value</b>   |
| COVID-19-negative                                                       | 57336         | 522               | 0.91%             | reference          | <b>&lt;0.001</b> |
| COVID-19-positive                                                       | 16483         | 1169              | 7.09%             | 10.6(9.28-12.11)   |                  |
| <b>Mild COVID-19 patients compared with matched negative patients</b>   |               |                   |                   |                    |                  |
| <b>Test result</b>                                                      | <b>Number</b> | <b>Death case</b> | <b>Death rate</b> | <b>HR(95% CI)</b>  | <b>P value</b>   |
| COVID-19-negative                                                       | 47462         | 381               | 0.80%             | reference          | <b>&lt;0.001</b> |
| Mild COVID-19                                                           | 13903         | 205               | 1.47%             | 2.11(1.7-2.6)      |                  |
| <b>Severe COVID-19 patients compared with matched negative patients</b> |               |                   |                   |                    |                  |
| <b>Test result</b>                                                      | <b>Number</b> | <b>Death case</b> | <b>Death rate</b> | <b>HR(95% CI)</b>  | <b>P value</b>   |
| COVID-19-negative                                                       | 9874          | 141               | 1.43%             | reference          | <b>&lt;0.001</b> |
| Severe COVID-19                                                         | 2580          | 964               | 37.36%            | 44.15(34.14-57.11) |                  |

Note: Analyses were adjusted for ethnicity, BMI, smoking status, and Charlson Comorbidity index. COVID-19, corona virus disease 2019; HR: hazards ratio; CI: confidence interval. Bold indicates p values less than 0.05.

**Supplementary Table 7: Characteristics of mild (non-hospitalized) and severe (hospitalized) COVID-19 patients.**

| Covariates                |                 | All COVID-19 patients<br>(n=16776) | Mild COVID-19 patients<br>(n=14106) | Severe COVID-19 patients<br>(n=2670) | p value          |
|---------------------------|-----------------|------------------------------------|-------------------------------------|--------------------------------------|------------------|
| <b>Sex (%)</b>            | Female/Male     | 52.8/47.2                          | 55.2/44.8                           | 40.3/59.7                            | <b>&lt;0.001</b> |
| <b>Age</b>                | Mean(SD)        | 64.6(8.6)                          | 63.5(8.3)                           | 70.2(8)                              | <b>&lt;0.001</b> |
|                           | Median[Min,Max] | 63.7[49.5, 82.9]                   | 62.2[49.5, 82.7]                    | 72.4[49.7, 82.9]                     |                  |
| <b>TDI</b>                | Mean(SD)        | -0.7(3.3)                          | -0.8(3.2)                           | 0(3.5)                               | <b>&lt;0.001</b> |
|                           | Median[Min,Max] | -1.5[-6.3, 10.6]                   | -1.6[-6.3, 10.6]                    | -0.8[-6.3, 10]                       |                  |
| <b>Ethnicity (%)</b>      | White/Non-white | 90/10                              | 90.3/9.7                            | 88.9/11.1                            | <b>0.033</b>     |
|                           | Missing         | N=101                              | N=75                                | N=26                                 |                  |
| <b>BMI (%)</b>            | Normal          | 25.5                               | 27.5                                | 14.6                                 | <b>&lt;0.001</b> |
|                           | Obese           | 31.8                               | 29.3                                | 45                                   |                  |
|                           | Overweight      | 42.4                               | 42.8                                | 40                                   |                  |
|                           | Underweight     | 0.4                                | 0.4                                 | 0.3                                  |                  |
|                           | Missing         | N=144                              | N=95                                | N=49                                 |                  |
| <b>Smoking status (%)</b> | Never           | 52.9                               | 54.9                                | 42.7                                 | <b>&lt;0.001</b> |
|                           | Current         | 11.6                               | 11.2                                | 13.4                                 |                  |
|                           | Previous        | 35.5                               | 33.9                                | 43.9                                 |                  |
|                           | Missing         | N=109                              | N=73                                | N=36                                 |                  |
| <b>CCI score</b>          | Mean(SD)        | 1.2(2.2)                           | 0.9(1.8)                            | 2.7(2.9)                             | <b>&lt;0.001</b> |
|                           | Median[Min,Max] | 0[0, 19]                           | 0[0, 19]                            | 2[0, 18]                             |                  |

COVID-19: corona virus disease 2019; TDI: Townsend deprivation index; BMI: body mass index; CCI: Charlson Comorbidity index. Bold indicates p values less than 0.05.

**Supplementary Table 8: Adjusted hazards ratios (HRs) of clinical comorbidities for severe COVID-19 patients (hospitalized) compared with mild COVID-19 patients (non-hospitalized).**

| Comorbidity                        | Mild COVID-19         |          |           | Severe COVID-19         |          |           | HR (95% CI)          | P      |
|------------------------------------|-----------------------|----------|-----------|-------------------------|----------|-----------|----------------------|--------|
|                                    | No. mild participants | No. case | Incidence | No. severe participants | No. case | Incidence |                      |        |
| Gastroenteritis and colitis        | 13612                 | 13       | 0.10%     | 2351                    | 92       | 3.91%     | 49.28(26.89-90.31)   | <0.001 |
| Septicaemia                        | 13815                 | 13       | 0.09%     | 2372                    | 53       | 2.23%     | 20.84(10.79-40.28)   | <0.001 |
| Infectious diseases                | 13470                 | 12       | 0.09%     | 2297                    | 70       | 3.05%     | 25.37(13.38-48.07)   | <0.001 |
| Blood cell disease                 | 13036                 | 15       | 0.12%     | 2148                    | 63       | 2.93%     | 22.7(12.55-41.07)    | <0.001 |
| Diabetes mellitus                  | 12933                 | 6        | 0.05%     | 1964                    | 70       | 3.56%     | 112.2(47.96-262.46)  | <0.001 |
| Hypoglycaemia                      | 14034                 | 8        | 0.06%     | 2561                    | 28       | 1.09%     | 14.68(6.42-33.56)    | <0.001 |
| Vitamin deficiency                 | 13801                 | 14       | 0.10%     | 2501                    | 41       | 1.64%     | 18.9(9.9-36.08)      | <0.001 |
| Obesity                            | 12930                 | 10       | 0.08%     | 2120                    | 81       | 3.82%     | 95.18(48.34-187.44)  | <0.001 |
| Hypercholesterolaemia              | 12249                 | 16       | 0.13%     | 1800                    | 76       | 4.22%     | 36.02(20.43-63.53)   | <0.001 |
| Electrolyte imbalance              | 13376                 | 37       | 0.28%     | 1938                    | 269      | 13.88%    | 48.23(33.62-69.2)    | <0.001 |
| Dementia                           | 13854                 | 7        | 0.05%     | 2472                    | 28       | 1.13%     | 11.66(4.94-27.56)    | <0.001 |
| Delirium                           | 13841                 | 19       | 0.14%     | 2356                    | 123      | 5.22%     | 27.86(16.67-46.56)   | <0.001 |
| Mental disease                     | 12346                 | 15       | 0.12%     | 2055                    | 66       | 3.21%     | 43.19(23.54-79.22)   | <0.001 |
| Sleep apnoea                       | 13825                 | 2        | 0.01%     | 2511                    | 15       | 0.60%     | 52.82(11.51-242.39)  | <0.001 |
| Hearing loss                       | 13841                 | 2        | 0.01%     | 2544                    | 15       | 0.59%     | 36.9(8.37-162.65)    | <0.001 |
| Hypertension                       | 10317                 | 22       | 0.21%     | 1087                    | 120      | 11.04%    | 56.82(35.53-90.89)   | <0.001 |
| Chronic ischaemic heart disease    | 13288                 | 7        | 0.05%     | 2133                    | 37       | 1.73%     | 27.48(11.83-63.86)   | <0.001 |
| Pulmonary embolism                 | 13950                 | 17       | 0.12%     | 2546                    | 95       | 3.73%     | 33.79(19.72-57.91)   | <0.001 |
| Other heart disease                | 12944                 | 27       | 0.21%     | 1859                    | 129      | 6.94%     | 28.45(18.45-43.87)   | <0.001 |
| Cerebrovascular diseases           | 13924                 | 4        | 0.03%     | 2510                    | 15       | 0.60%     | 14.58(4.54-46.79)    | <0.001 |
| Vascular disease                   | 13833                 | 6        | 0.04%     | 2467                    | 18       | 0.73%     | 16.11(5.98-43.45)    | <0.001 |
| Hypotension                        | 13653                 | 16       | 0.12%     | 2316                    | 91       | 3.93%     | 31.86(18.3-55.48)    | <0.001 |
| Lower respiratory infection        | 13141                 | 41       | 0.31%     | 1323                    | 816      | 61.68%    | 364.28(264.7-501.32) | <0.001 |
| COPD/Emphysema                     | 13923                 | 6        | 0.04%     | 2364                    | 66       | 2.79%     | 47.24(19.95-111.85)  | <0.001 |
| Asthma                             | 12667                 | 4        | 0.03%     | 2154                    | 42       | 1.95%     | 132.33(46.31-378.11) | <0.001 |
| Other lung disease                 | 13788                 | 10       | 0.07%     | 2317                    | 63       | 2.72%     | 38.56(19.22-77.36)   | <0.001 |
| Pleural effusion                   | 13787                 | 6        | 0.04%     | 2407                    | 44       | 1.83%     | 40.4(16.62-98.21)    | <0.001 |
| Respiratory failure                | 14023                 | 8        | 0.06%     | 2335                    | 323      | 13.83%    | 305.3(150.45-619.53) | <0.001 |
| Gastro-oesophageal reflux disease  | 12964                 | 20       | 0.15%     | 2246                    | 45       | 2.00%     | 16.83(9.54-29.7)     | <0.001 |
| Diverticular disease of intestine  | 13672                 | 10       | 0.07%     | 2438                    | 28       | 1.15%     | 16.32(7.56-35.23)    | <0.001 |
| Fecal abnormalities                | 13058                 | 20       | 0.15%     | 2090                    | 84       | 4.02%     | 21(12.57-35.09)      | <0.001 |
| Fatty liver                        | 13887                 | 4        | 0.03%     | 2553                    | 24       | 0.94%     | 39.15(12.96-118.24)  | <0.001 |
| Cellulitis                         | 13733                 | 3        | 0.02%     | 2434                    | 9        | 0.37%     | 15.09(3.8-59.95)     | <0.001 |
| Rash and dermatitis                | 13966                 | 8        | 0.06%     | 2574                    | 32       | 1.24%     | 21.03(9.26-47.76)    | <0.001 |
| Decubitus ulcer                    | 13995                 | 8        | 0.06%     | 2535                    | 58       | 2.29%     | 33.45(15.55-71.95)   | <0.001 |
| Gout                               | 13911                 | 2        | 0.01%     | 2528                    | 17       | 0.67%     | 33.93(7.83-147.03)   | <0.001 |
| Osteoarthritis                     | 12992                 | 23       | 0.18%     | 2100                    | 82       | 3.90%     | 24.51(14.99-40.08)   | <0.001 |
| Renal failure                      | 13331                 | 28       | 0.21%     | 1860                    | 202      | 10.86%    | 44.33(29.44-66.75)   | <0.001 |
| Urinary tract infection            | 13243                 | 20       | 0.15%     | 2146                    | 48       | 2.24%     | 11.46(6.52-20.13)    | <0.001 |
| Hyperplasia of prostate            | 13514                 | 4        | 0.03%     | 2348                    | 33       | 1.41%     | 31.75(11.22-89.87)   | <0.001 |
| Arrhythmia                         | 13764                 | 6        | 0.04%     | 2449                    | 46       | 1.88%     | 54.16(22.44-130.71)  | <0.001 |
| Cough                              | 13882                 | 13       | 0.09%     | 2463                    | 61       | 2.48%     | 34.73(18.44-65.4)    | <0.001 |
| Dyspnea and asphyxia               | 13688                 | 19       | 0.14%     | 2324                    | 90       | 3.87%     | 37.68(22.39-63.43)   | <0.001 |
| Nausea and vomiting                | 13431                 | 16       | 0.12%     | 2341                    | 27       | 1.15%     | 12.96(6.63-25.3)     | <0.001 |
| Abnormalities of gait and mobility | 13471                 | 19       | 0.14%     | 2096                    | 89       | 4.25%     | 23.84(14.2-40.04)    | <0.001 |
| Urinary abnormality                | 12908                 | 13       | 0.10%     | 2088                    | 64       | 3.07%     | 24.64(13.19-46.02)   | <0.001 |
| Disorientation                     | 13863                 | 16       | 0.12%     | 2434                    | 32       | 1.31%     | 8.63(4.48-16.62)     | <0.001 |
| Other cognitive symptoms           | 14003                 | 3        | 0.02%     | 2581                    | 12       | 0.46%     | 12.01(3.21-44.92)    | <0.001 |
| Emotional state symptoms and signs | 14008                 | 7        | 0.05%     | 2607                    | 25       | 0.96%     | 17.12(6.98-42.01)    | <0.001 |
| General symptoms and signs         | 12540                 | 33       | 0.26%     | 1893                    | 130      | 6.87%     | 27.12(18.07-40.71)   | <0.001 |
| Abnormal examing results           | 13383                 | 16       | 0.12%     | 2233                    | 93       | 4.16%     | 35.53(20.39-61.88)   | <0.001 |

Note: Analyses were adjusted for age, sex, TDI, ethnicity, BMI, smoking status, and CCI. COVID-19: corona virus disease 2019; TDI: Townsend deprivation index; BMI: body mass index; CCI: Charlson Comorbidity index; CI: confidence interval; COPD: chronic obstructive pulmonary disease. Bold indicates p values less than 0.05.

**Supplementary Table 9: The adjusted risk of clinical comorbidity in COVID-19-positive participants compared with matched COVID-19-negative participants in females and males, respectively.**

| Comorbidity                        | Male                      |          |           |                           |          |           |                         |         | Female                    |          |           |                           |          |           |                       |         |
|------------------------------------|---------------------------|----------|-----------|---------------------------|----------|-----------|-------------------------|---------|---------------------------|----------|-----------|---------------------------|----------|-----------|-----------------------|---------|
|                                    | COVID-19 negative         |          |           | COVID-19 positive         |          |           | HR (95% CI)             | P value | COVID-19 negative         |          |           | COVID-19 positive         |          |           | HR (95% CI)           | P value |
|                                    | No. negative participants | No. case | Incidence | No. positive participants | No. case | Incidence |                         |         | No. negative participants | No. case | Incidence | No. positive participants | No. case | Incidence |                       |         |
| Gastroenteritis and colitis        | 25787                     | 20       | 0.08%     | 7536                      | 51       | 0.68%     | 53.57(9.28-309.36)      | <0.001  | 29618                     | 32       | 0.11%     | 8427                      | 54       | 0.64%     | 5.55(2.88-10.7)       | <0.001  |
| Septicaemia                        | 26164                     | 16       | 0.06%     | 7578                      | 40       | 0.53%     | 18.45(5.18-65.7)        | <0.001  | 30580                     | 13       | 0.04%     | 8609                      | 26       | 0.30%     | 97.91(6.64-1444.38)   | <0.001  |
| Infectious diseases                | 25645                     | 21       | 0.08%     | 7435                      | 51       | 0.69%     | 12.12(4.79-30.67)       | <0.001  | 29755                     | 16       | 0.05%     | 8332                      | 31       | 0.37%     | 9.71(3.27-28.8)       | <0.001  |
| Blood cell disease                 | 24536                     | 39       | 0.16%     | 7210                      | 47       | 0.65%     | 5.42(2.73-10.78)        | <0.001  | 28004                     | 53       | 0.19%     | 7974                      | 31       | 0.39%     | 1.57(0.87-2.84)       | 0.134   |
| Diabetes mellitus                  | 23654                     | 41       | 0.17%     | 6762                      | 45       | 0.67%     | 3.08(1.37-6.92)         | 0.006   | 28989                     | 25       | 0.09%     | 8135                      | 31       | 0.38%     | 4.16(1.55-11.22)      | 0.005   |
| Hypoglycaemia                      | 26742                     | 9        | 0.03%     | 7801                      | 17       | 0.22%     | NA                      | 0.993   | 31080                     | 7        | 0.02%     | 8794                      | 19       | 0.22%     | 20.37(1.71-243.14)    | 0.017   |
| Vitamin deficiency                 | 26483                     | 14       | 0.05%     | 7714                      | 26       | 0.34%     | 6.98(2.36-20.62)        | <0.001  | 30494                     | 19       | 0.06%     | 8588                      | 29       | 0.34%     | 8.45(3.17-22.53)      | <0.001  |
| Obesity                            | 24290                     | 55       | 0.23%     | 7098                      | 43       | 0.61%     | 2.34(1.1-5)             | 0.028   | 28147                     | 65       | 0.23%     | 7952                      | 48       | 0.60%     | 1.63(0.8-3.34)        | 0.181   |
| Hypercholesterolaemia              | 21400                     | 66       | 0.31%     | 6299                      | 49       | 0.78%     | 2.73(1.44-5.19)         | 0.002   | 27423                     | 53       | 0.19%     | 7750                      | 43       | 0.55%     | 3.03(1.73-5.29)       | <0.001  |
| Electrolyte imbalance              | 25060                     | 69       | 0.28%     | 7126                      | 179      | 2.51%     | 16.22(9.3-28.27)        | <0.001  | 29333                     | 68       | 0.23%     | 8188                      | 127      | 1.55%     | 9.49(5.82-15.47)      | <0.001  |
| Dementia                           | 26774                     | 9        | 0.03%     | 7701                      | 22       | 0.29%     | 8.37(2.51-27.95)        | <0.001  | 31062                     | 9        | 0.03%     | 8625                      | 13       | 0.15%     | 14.03(1.5-130.87)     | 0.020   |
| Delirium                           | 26602                     | 20       | 0.08%     | 7580                      | 87       | 1.15%     | 18.3(7.65-43.78)        | <0.001  | 30959                     | 15       | 0.05%     | 8617                      | 55       | 0.64%     | 16.07(6.08-42.45)     | <0.001  |
| Mental disease                     | 23316                     | 47       | 0.20%     | 6926                      | 40       | 0.58%     | 2.67(1.39-5.13)         | 0.003   | 26250                     | 71       | 0.27%     | 7475                      | 41       | 0.55%     | 2(1.17-3.39)          | 0.011   |
| Hypertension                       | 16410                     | 105      | 0.64%     | 4966                      | 97       | 1.95%     | 2.77(1.74-4.41)         | <0.001  | 22113                     | 113      | 0.51%     | 6438                      | 45       | 0.70%     | 1.45(0.84-2.49)       | 0.184   |
| Pulmonary embolism                 | 26463                     | 22       | 0.08%     | 7766                      | 81       | 1.04%     | 32.17(11.08-93.39)      | <0.001  | 30826                     | 21       | 0.07%     | 8730                      | 31       | 0.36%     | 5.22(2.44-11.18)      | <0.001  |
| Other heart disease                | 22829                     | 94       | 0.41%     | 6691                      | 100      | 1.49%     | 3.67(2.37-5.68)         | <0.001  | 28722                     | 68       | 0.24%     | 8112                      | 56       | 0.69%     | 4.35(2.48-7.61)       | <0.001  |
| Cerebrovascular diseases           | 26632                     | 21       | 0.08%     | 7722                      | 10       | 0.13%     | 4.74(1.2-18.77)         | 0.027   | 30963                     | 18       | 0.06%     | 8712                      | 9        | 0.10%     | 1.79(0.46-6.97)       | 0.400   |
| Vascular disease                   | 26045                     | 15       | 0.06%     | 7606                      | 15       | 0.20%     | 3.53(1.05-11.93)        | 0.042   | 30689                     | 7        | 0.02%     | 8694                      | 9        | 0.10%     | 4.11(0.61-27.55)      | 0.146   |
| Hypotension                        | 25864                     | 34       | 0.13%     | 7464                      | 58       | 0.78%     | 11.15(5.04-24.67)       | <0.001  | 30205                     | 23       | 0.08%     | 8505                      | 49       | 0.58%     | 12.7(4.96-32.54)      | <0.001  |
| Lower respiratory infection        | 24433                     | 49       | 0.20%     | 6624                      | 517      | 7.80%     | 107.04(48.83-234.66)    | <0.001  | 28967                     | 39       | 0.13%     | 7840                      | 340      | 4.34%     | 40.4(23.03-70.88)     | <0.001  |
| COPD/Emphysema                     | 26343                     | 8        | 0.03%     | 7633                      | 49       | 0.64%     | 1732.86(2.07-1448251.4) | 0.030   | 30705                     | 9        | 0.03%     | 8654                      | 23       | 0.27%     | NA                    | 0.997   |
| Asthma                             | 24307                     | 27       | 0.11%     | 7098                      | 18       | 0.25%     | 4.94(1.8-13.54)         | 0.002   | 27204                     | 40       | 0.15%     | 7723                      | 28       | 0.36%     | 2.49(1.21-5.1)        | 0.013   |
| Other lung disease                 | 25963                     | 30       | 0.12%     | 7551                      | 40       | 0.53%     | 4.33(2.16-8.7)          | <0.001  | 30229                     | 30       | 0.10%     | 8554                      | 33       | 0.39%     | 6.69(2.83-15.82)      | <0.001  |
| Pleural effusion                   | 26040                     | 35       | 0.13%     | 7563                      | 23       | 0.30%     | 2.22(0.98-5.02)         | 0.055   | 30520                     | 26       | 0.09%     | 8631                      | 27       | 0.31%     | 5.91(2.42-14.4)       | <0.001  |
| Respiratory failure                | 26773                     | 12       | 0.04%     | 7664                      | 223      | 2.91%     | 906.77(67.42-12195.04)  | <0.001  | 31079                     | 5        | 0.02%     | 8694                      | 108      | 1.24%     | 64.43(17.57-236.32)   | <0.001  |
| Gastro-oesophageal reflux disease  | 24311                     | 55       | 0.23%     | 7215                      | 30       | 0.42%     | 1.81(0.98-3.35)         | 0.057   | 27685                     | 50       | 0.18%     | 7995                      | 35       | 0.44%     | 3.53(1.82-6.84)       | <0.001  |
| Diverticular disease of intestine  | 25947                     | 36       | 0.14%     | 7615                      | 16       | 0.21%     | 1.69(0.72-3.97)         | 0.228   | 29890                     | 27       | 0.09%     | 8495                      | 22       | 0.26%     | 3.35(1.44-7.78)       | 0.005   |
| Fecal abnormalities                | 24907                     | 45       | 0.18%     | 7195                      | 66       | 0.92%     | 7.08(3.7-13.56)         | <0.001  | 28191                     | 48       | 0.17%     | 7953                      | 38       | 0.48%     | 3.71(1.96-7.02)       | <0.001  |
| Rash and dermatitis                | 26654                     | 5        | 0.02%     | 7792                      | 24       | 0.31%     | 33.8(2.8-407.91)        | 0.006   | 30902                     | 5        | 0.02%     | 8748                      | 16       | 0.18%     | NA                    | 0.994   |
| Decubitus ulcer                    | 26825                     | 10       | 0.04%     | 7769                      | 40       | 0.51%     | NA                      | 0.990   | 31119                     | 8        | 0.03%     | 8761                      | 26       | 0.30%     | 16.91(3.45-82.9)      | <0.001  |
| Osteoarthritis                     | 24821                     | 53       | 0.21%     | 7306                      | 45       | 0.62%     | 3.24(1.83-5.73)         | <0.001  | 27251                     | 81       | 0.30%     | 7786                      | 60       | 0.77%     | 2.46(1.5-4.03)        | <0.001  |
| Renal failure                      | 24612                     | 65       | 0.26%     | 7006                      | 140      | 2.00%     | 8.06(4.96-13.11)        | <0.001  | 29349                     | 49       | 0.17%     | 8185                      | 90       | 1.10%     | 9.63(5.42-17.12)      | <0.001  |
| Urinary tract infection            | 25324                     | 36       | 0.14%     | 7300                      | 35       | 0.48%     | 8.24(3.29-20.61)        | <0.001  | 29110                     | 25       | 0.09%     | 8089                      | 33       | 0.41%     | 8.52(3.64-19.94)      | <0.001  |
| Arrhythmia                         | 25942                     | 21       | 0.08%     | 7569                      | 31       | 0.41%     | 10.02(3.15-31.81)       | <0.001  | 30434                     | 21       | 0.07%     | 8644                      | 21       | 0.24%     | 3.84(1.61-9.18)       | 0.002   |
| Cough                              | 26455                     | 12       | 0.05%     | 7694                      | 44       | 0.57%     | 31.7(6.78-148.13)       | <0.001  | 30641                     | 6        | 0.02%     | 8651                      | 30       | 0.35%     | 270.52(2.23-32745.97) | 0.022   |
| Dyspnea and asphyxia               | 25945                     | 26       | 0.10%     | 7541                      | 62       | 0.82%     | 20.18(6.9-59.03)        | <0.001  | 30014                     | 25       | 0.08%     | 8471                      | 47       | 0.55%     | 9.54(4.06-22.43)      | <0.001  |
| Nausea and vomiting                | 25705                     | 28       | 0.11%     | 7524                      | 16       | 0.21%     | 2.91(0.92-9.24)         | 0.070   | 28833                     | 36       | 0.12%     | 8248                      | 27       | 0.33%     | 3.1(1.56-6.15)        | 0.001   |
| Abnormalities of gait and mobility | 25884                     | 45       | 0.17%     | 7278                      | 64       | 0.88%     | 4.86(2.71-8.72)         | <0.001  | 30038                     | 34       | 0.11%     | 8289                      | 44       | 0.53%     | 6.23(3.14-12.38)      | <0.001  |
| Urinary abnormality                | 23420                     | 49       | 0.21%     | 6879                      | 46       | 0.67%     | 3.02(1.65-5.54)         | <0.001  | 28808                     | 34       | 0.12%     | 8117                      | 31       | 0.38%     | 8.29(3.37-20.41)      | <0.001  |
| Disorientation                     | 26507                     | 21       | 0.08%     | 7640                      | 32       | 0.42%     | 15.81(4.27-58.6)        | <0.001  | 30900                     | 11       | 0.04%     | 8657                      | 16       | 0.18%     | 95.17(2.03-4459.31)   | 0.020   |
| Emotional state symptoms and signs | 26807                     | 8        | 0.03%     | 7820                      | 19       | 0.24%     | 24.02(3.21-179.82)      | 0.002   | 31111                     | 5        | 0.02%     | 8795                      | 13       | 0.15%     | 16.54(1.08-252.35)    | 0.044   |
| General symptoms and signs         | 23479                     | 60       | 0.26%     | 6788                      | 96       | 1.41%     | 7.19(4.08-12.66)        | <0.001  | 27177                     | 64       | 0.24%     | 7645                      | 67       | 0.88%     | 4.45(2.71-7.31)       | <0.001  |
| Abnormal examining results         | 24641                     | 60       | 0.24%     | 7221                      | 69       | 0.96%     | 7.49(4.16-13.47)        | <0.001  | 29718                     | 34       | 0.11%     | 8395                      | 40       | 0.48%     | 5.63(2.79-11.38)      | <0.001  |

Note: Analyses were adjusted for ethnicity, BMI, smoking status and CCI. COVID-19: corona virus disease 2019; BMI: body mass index; CCI: Charlson Comorbidity index; COPD: chronic obstructive pulmonary disease; HR: hazards ratio; CI: confidence interval. Bold indicates p values less than 0.05.

**Supplementary Table 10: The adjusted risk of clinical comorbidity in COVID-19-positive participants compared with matched COVID-19-negative participants stratified by BMI.**

| Comorbidity                        | Overweight or obesity     |          |           |                           |          |           |                        |         | Normal or underweight     |          |           |                           |          |           |                         |         |
|------------------------------------|---------------------------|----------|-----------|---------------------------|----------|-----------|------------------------|---------|---------------------------|----------|-----------|---------------------------|----------|-----------|-------------------------|---------|
|                                    | COVID-19-negative         |          |           | COVID-19-positive         |          |           | HR (95% CI)            | P value | COVID-19-negative         |          |           | COVID-19-positive         |          |           | HR (95% CI)             | P value |
|                                    | No. negative participants | No. case | Incidence | No. positive participants | No. case | Incidence |                        |         | No. negative participants | No. case | Incidence | No. positive participants | No. case | Incidence |                         |         |
| Gastroenteritis and colitis        | 38088                     | 34       | 0.09%     | 11692                     | 97       | 0.83%     | 11.68(7-19.49)         | <0.001  | 17317                     | 18       | 0.10%     | 4271                      | 8        | 0.19%     | 925.27(0.01-67614845.2) | 0.232   |
| Septicaemia                        | 39028                     | 23       | 0.06%     | 11840                     | 53       | 0.45%     | 15.56(6.92-35)         | <0.001  | 17716                     | 6        | 0.03%     | 4347                      | 13       | 0.30%     | NA                      | 0.996   |
| Infectious diseases                | 37987                     | 28       | 0.07%     | 11534                     | 69       | 0.60%     | 7.97(4.72-13.46)       | <0.001  | 17413                     | 9        | 0.05%     | 4233                      | 13       | 0.31%     | NA                      | 0.998   |
| Blood cell disease                 | 35996                     | 68       | 0.19%     | 11115                     | 58       | 0.52%     | 2.58(1.7-3.91)         | <0.001  | 16544                     | 24       | 0.15%     | 4069                      | 20       | 0.49%     | 1.92(0.65-5.65)         | 0.237   |
| Diabetes mellitus                  | 35091                     | 61       | 0.17%     | 10617                     | 75       | 0.71%     | 3.98(2.54-6.22)        | <0.001  | 17552                     | 5        | 0.03%     | 4280                      | 1        | 0.02%     | NA                      | 1.000   |
| Hypoglycaemia                      | 39811                     | 12       | 0.03%     | 12169                     | 28       | 0.23%     | 12.01(3.67-39.27)      | <0.001  | 18011                     | 4        | 0.02%     | 4426                      | 8        | 0.18%     | NA                      | 0.999   |
| Vitamin deficiency                 | 39199                     | 26       | 0.07%     | 11966                     | 46       | 0.38%     | 6.62(3.66-11.98)       | <0.001  | 17778                     | 7        | 0.04%     | 4336                      | 9        | 0.21%     | 4.08(0.7-23.58)         | 0.117   |
| Obesity                            | 34514                     | 117      | 0.34%     | 10646                     | 88       | 0.83%     | 2.56(1.82-3.58)        | <0.001  | 17923                     | 3        | 0.02%     | 4404                      | 3        | 0.07%     | NA                      | 1.000   |
| Hypercholesterolaemia              | 32462                     | 85       | 0.26%     | 10036                     | 79       | 0.79%     | 3.82(2.57-5.69)        | <0.001  | 16361                     | 34       | 0.21%     | 4013                      | 13       | 0.32%     | 3.23(0.99-10.61)        | 0.053   |
| Electrolyte imbalance              | 37336                     | 104      | 0.28%     | 11197                     | 262      | 2.34%     | 10.74(7.92-14.56)      | <0.001  | 17057                     | 33       | 0.19%     | 4117                      | 44       | 1.07%     | 4.74(2.06-10.95)        | <0.001  |
| Dementia                           | 39845                     | 9        | 0.02%     | 11989                     | 28       | 0.23%     | 19.88(5.71-69.23)      | <0.001  | 17991                     | 9        | 0.05%     | 4337                      | 7        | 0.16%     | NA                      | 0.997   |
| Delirium                           | 39624                     | 26       | 0.07%     | 11874                     | 120      | 1.01%     | 17.33(10.1-29.75)      | <0.001  | 17937                     | 9        | 0.05%     | 4323                      | 22       | 0.51%     | 11.97(1.14-125.88)      | 0.039   |
| Mental disease                     | 33839                     | 79       | 0.23%     | 10528                     | 70       | 0.66%     | 2.87(1.91-4.31)        | <0.001  | 15727                     | 39       | 0.25%     | 3873                      | 11       | 0.28%     | 0.48(0.12-1.92)         | 0.298   |
| Sleep apnoea                       | 38558                     | 16       | 0.04%     | 11916                     | 16       | 0.13%     | 3.26(1.19-8.94)        | 0.022   | 17960                     | 2        | 0.01%     | 4420                      | 1        | 0.02%     | NA                      | 1.000   |
| Hearing loss                       | 39059                     | 24       | 0.06%     | 12013                     | 15       | 0.12%     | 2.28(1.03-5.03)        | 0.041   | 17752                     | 10       | 0.06%     | 4372                      | 2        | 0.05%     | 0.94(0.12-7.51)         | 0.954   |
| Hypertension                       | 24054                     | 168      | 0.70%     | 7788                      | 128      | 1.64%     | 3.13(2.25-4.35)        | <0.001  | 14469                     | 50       | 0.35%     | 3616                      | 14       | 0.39%     | 0.43(0.12-1.54)         | 0.194   |
| Chronic ischaemic heart disease    | 36118                     | 58       | 0.16%     | 11183                     | 39       | 0.35%     | 2.39(1.45-3.92)        | <0.001  | 17209                     | 11       | 0.06%     | 4238                      | 5        | 0.12%     | 9.45(0.61-145.12)       | 0.107   |
| Pulmonary embolism                 | 39376                     | 34       | 0.09%     | 12097                     | 96       | 0.79%     | 11.57(6.92-19.34)      | <0.001  | 17913                     | 9        | 0.05%     | 4399                      | 16       | 0.36%     | 18.54(1.81-189.71)      | 0.014   |
| Other heart disease                | 34801                     | 135      | 0.39%     | 10687                     | 139      | 1.30%     | 4.05(2.99-5.47)        | <0.001  | 16750                     | 27       | 0.16%     | 4116                      | 17       | 0.41%     | 2.21(0.58-8.33)         | 0.243   |
| Vascular disease                   | 38955                     | 14       | 0.04%     | 11940                     | 22       | 0.18%     | 8.69(3-25.2)           | <0.001  | 17779                     | 8        | 0.04%     | 4360                      | 2        | 0.05%     | NA                      | 0.999   |
| Hypotension                        | 38559                     | 39       | 0.10%     | 11713                     | 90       | 0.77%     | 8.69(5.49-13.75)       | <0.001  | 17510                     | 18       | 0.10%     | 4256                      | 17       | 0.40%     | 6.81(1.38-33.68)        | 0.019   |
| Lower respiratory infection        | 36491                     | 67       | 0.18%     | 10480                     | 748      | 7.14%     | 64.13(42.74-96.23)     | <0.001  | 16909                     | 21       | 0.12%     | 3984                      | 109      | 2.74%     | 34.23(9.81-119.4)       | <0.001  |
| COPD/Emphysema                     | 39302                     | 8        | 0.02%     | 11962                     | 61       | 0.51%     | 1849.55(8.1-422489.31) | 0.007   | 17746                     | 9        | 0.05%     | 4325                      | 11       | 0.25%     | NA                      | 0.999   |
| Asthma                             | 35052                     | 45       | 0.13%     | 10772                     | 42       | 0.39%     | 2.72(1.66-4.45)        | <0.001  | 16459                     | 22       | 0.13%     | 4049                      | 4        | 0.10%     | 0.02(0-1.55)            | 0.076   |
| Other lung disease                 | 38619                     | 37       | 0.10%     | 11805                     | 57       | 0.48%     | 5.98(3.55-10.07)       | <0.001  | 17573                     | 23       | 0.13%     | 4300                      | 16       | 0.37%     | 13.48(1.45-125.08)      | 0.022   |
| Pleural effusion                   | 38904                     | 46       | 0.12%     | 11859                     | 39       | 0.33%     | 4.58(2.61-8.06)        | <0.001  | 17656                     | 15       | 0.08%     | 4335                      | 11       | 0.25%     | 34.65(1.31-919.12)      | 0.034   |
| Respiratory failure                | 39849                     | 12       | 0.03%     | 11987                     | 293      | 2.44%     | 146.76(54.9-392.36)    | <0.001  | 18003                     | 5        | 0.03%     | 4371                      | 38       | 0.87%     | NA                      | 0.997   |
| Gastro-oesophageal reflux disease  | 35325                     | 78       | 0.22%     | 11050                     | 55       | 0.50%     | 2.57(1.71-3.85)        | <0.001  | 16671                     | 27       | 0.16%     | 4160                      | 10       | 0.24%     | 1.53(0.36-6.56)         | 0.565   |
| Diverticular disease of intestine  | 38185                     | 51       | 0.13%     | 11782                     | 33       | 0.28%     | 2.63(1.56-4.43)        | <0.001  | 17652                     | 12       | 0.07%     | 4328                      | 5        | 0.12%     | NA                      | 0.999   |
| Fecal abnormalities                | 36536                     | 69       | 0.19%     | 11075                     | 80       | 0.72%     | 3.9(2.66-5.73)         | <0.001  | 16562                     | 24       | 0.14%     | 4073                      | 24       | 0.59%     | 2.56(1.13-5.79)         | 0.025   |
| Fatty liver                        | 39185                     | 39       | 0.10%     | 12026                     | 27       | 0.22%     | 2.66(1.46-4.85)        | 0.001   | 17993                     | 4        | 0.02%     | 4414                      | 1        | 0.02%     | NA                      | 1.000   |
| Cellulitis                         | 38787                     | 16       | 0.04%     | 11820                     | 12       | 0.10%     | 3.15(1.3-7.65)         | 0.011   | 17805                     | 1        | 0.01%     | 4347                      | 0        | 0.00%     | NA                      | 1.000   |
| Rash and dermatitis                | 39638                     | 8        | 0.02%     | 12136                     | 34       | 0.28%     | 19.7(6.26-62.02)       | <0.001  | 17918                     | 2        | 0.01%     | 4404                      | 6        | 0.14%     | 1.72(0.11-27.88)        | 0.703   |
| Decubitus ulcer                    | 39933                     | 13       | 0.03%     | 12148                     | 51       | 0.42%     | 87.23(15.4-494.09)     | <0.001  | 18011                     | 5        | 0.03%     | 4382                      | 15       | 0.34%     | NA                      | 0.999   |
| Osteoarthritis                     | 35628                     | 90       | 0.25%     | 11009                     | 90       | 0.82%     | 2.98(2.13-4.17)        | <0.001  | 16444                     | 44       | 0.27%     | 4083                      | 15       | 0.37%     | 1.31(0.51-3.32)         | 0.573   |
| Renal failure                      | 36663                     | 95       | 0.26%     | 11000                     | 198      | 1.80%     | 9.06(6.51-12.62)       | <0.001  | 17298                     | 19       | 0.11%     | 4191                      | 32       | 0.76%     | 22.01(2.66-182.27)      | 0.004   |
| Urinary tract infection            | 37305                     | 48       | 0.13%     | 11234                     | 54       | 0.48%     | 4.1(2.6-6.48)          | <0.001  | 17129                     | 13       | 0.08%     | 4155                      | 14       | 0.34%     | 5.82(1.17-28.92)        | 0.031   |
| Hyperplasia of prostate            | 37353                     | 61       | 0.16%     | 11571                     | 32       | 0.28%     | 2.22(1.3-3.79)         | 0.004   | 17352                     | 12       | 0.07%     | 4291                      | 5        | 0.12%     | NA                      | 1.000   |
| Arrhythmia                         | 38737                     | 31       | 0.08%     | 11888                     | 43       | 0.36%     | 5.87(3.21-10.71)       | <0.001  | 17639                     | 11       | 0.06%     | 4325                      | 9        | 0.21%     | 4.8(0.56-41.47)         | 0.154   |
| Cough                              | 39273                     | 15       | 0.04%     | 11991                     | 64       | 0.53%     | 15.34(7.47-31.51)      | <0.001  | 17823                     | 3        | 0.02%     | 4354                      | 10       | 0.23%     | 3.57(0.66-19.33)        | 0.139   |
| Dyspnea and asphyxia               | 38329                     | 41       | 0.11%     | 11694                     | 92       | 0.79%     | 9.63(5.8-15.99)        | <0.001  | 17630                     | 10       | 0.06%     | 4318                      | 17       | 0.39%     | 7.76(1.59-37.88)        | 0.011   |
| Nausea and vomiting                | 37477                     | 46       | 0.12%     | 11562                     | 35       | 0.30%     | 2.8(1.66-4.74)         | <0.001  | 17061                     | 18       | 0.11%     | 4210                      | 8        | 0.19%     | 3.47(0.2-59.06)         | 0.389   |
| Abnormalities of gait and mobility | 38394                     | 58       | 0.15%     | 11396                     | 91       | 0.80%     | 5.71(3.84-8.47)        | <0.001  | 17528                     | 21       | 0.12%     | 4171                      | 17       | 0.41%     | 5.14(0.9-29.29)         | 0.065   |
| Urinary abnormality                | 35623                     | 60       | 0.17%     | 10936                     | 62       | 0.57%     | 3.67(2.41-5.61)        | <0.001  | 16605                     | 23       | 0.14%     | 4060                      | 15       | 0.37%     | 1.76(0.6-5.15)          | 0.302   |
| Disorientation                     | 39542                     | 19       | 0.05%     | 11959                     | 34       | 0.28%     | 12.32(5.22-29.09)      | <0.001  | 17865                     | 13       | 0.07%     | 4338                      | 14       | 0.32%     | 6.89(1.12-42.33)        | 0.037   |
| Other cognitive symptoms           | 39919                     | 7        | 0.02%     | 12183                     | 12       | 0.10%     | 18.24(1.89-175.94)     | 0.012   | 18014                     | 4        | 0.02%     | 4401                      | 3        | 0.07%     | NA                      | 1.000   |
| Emotional state symptoms and signs | 39902                     | 10       | 0.03%     | 12215                     | 22       | 0.18%     | 8.2(2.99-22.47)        | <0.001  | 18016                     | 3        | 0.02%     | 4400                      | 10       | 0.23%     | NA                      | 0.998   |
| General symptoms and signs         | 34671                     | 88       | 0.25%     | 10544                     | 137      | 1.30%     | 6.13(4.32-8.71)        | <0.001  | 15985                     | 36       | 0.23%     | 3889                      | 26       | 0.67%     | 1.49(0.46-4.77)         | 0.506   |
| Abnormal examing results           | 37204                     | 72       | 0.19%     | 11393                     | 85       | 0.75%     | 4.58(3.12-6.74)        | <0.001  | 17155                     | 22       | 0.13%     | 4223                      | 24       | 0.57%     | 4.43(1.03-18.99)        | 0.045   |

Note: Analyses were adjusted for ethnicity, smoking status, and CCI. COVID-19: corona virus disease 2019; BMI: body mass index; CCI: Charlson Comorbidity index; COPD: chronic obstructive pulmonary disease; HR: hazards ratio; CI: confidence interval. Bold indicates p values less than 0.05.

**Supplementary Table 11: The adjusted risk of clinical comorbidity in COVID-19-positive participants compared with matched COVID-19-negative participants stratified by smoking status.**

| Comorbidity                        | Current/ex-smoker         |          |           |                           |          |           |                      |         | Never-smoker              |          |           |                           |          |           |                       |         |
|------------------------------------|---------------------------|----------|-----------|---------------------------|----------|-----------|----------------------|---------|---------------------------|----------|-----------|---------------------------|----------|-----------|-----------------------|---------|
|                                    | COVID-19-negative         |          |           | COVID-19-positive         |          |           | HR (95% CI)          | P value | COVID-19-negative         |          |           | COVID-19-positive         |          |           | HR (95% CI)           | P value |
|                                    | No. negative participants | No. case | Incidence | No. positive participants | No. case | Incidence |                      |         | No. negative participants | No. case | Incidence | No. positive participants | No. case | Incidence |                       |         |
| Gastroenteritis and colitis        | 25409                     | 26       | 0.10%     | 7403                      | 58       | 0.78%     | 8.07(3.94-16.57)     | <0.001  | 29609                     | 26       | 0.09%     | 8459                      | 45       | 0.53%     | 5.14(2.56-10.33)      | <0.001  |
| Septicaemia                        | 26022                     | 16       | 0.06%     | 7494                      | 44       | 0.59%     | 36.47(8.34-159.4)    | <0.001  | 30336                     | 13       | 0.04%     | 8589                      | 21       | 0.24%     | 11.67(3.04-44.75)     | <0.001  |
| Infectious diseases                | 25374                     | 25       | 0.10%     | 7267                      | 50       | 0.69%     | 7.22(3.65-14.3)      | <0.001  | 29652                     | 12       | 0.04%     | 8401                      | 30       | 0.36%     | NA                    | 0.998   |
| Blood cell disease                 | 24068                     | 55       | 0.23%     | 6993                      | 40       | 0.57%     | 2.01(1.09-3.71)      | 0.025   | 28118                     | 37       | 0.13%     | 8098                      | 37       | 0.46%     | 3.05(1.57-5.94)       | 0.001   |
| Diabetes mellitus                  | 23779                     | 32       | 0.13%     | 6810                      | 38       | 0.56%     | 1.84(0.9-3.75)       | 0.095   | 28532                     | 34       | 0.12%     | 8002                      | 37       | 0.46%     | 4.49(1.83-11.06)      | 0.001   |
| Hypoglycaemia                      | 26640                     | 12       | 0.05%     | 7733                      | 17       | 0.22%     | 14.49(1.5-139.87)    | 0.021   | 30785                     | 4        | 0.01%     | 8754                      | 19       | 0.22%     | NA                    | 0.997   |
| Vitamin deficiency                 | 26210                     | 15       | 0.06%     | 7591                      | 23       | 0.30%     | 8.71(2.95-25.67)     | <0.001  | 30367                     | 18       | 0.06%     | 8609                      | 32       | 0.37%     | 7.2(3.02-17.17)       | <0.001  |
| Obesity                            | 23868                     | 59       | 0.25%     | 6922                      | 46       | 0.66%     | 2.63(1.29-5.35)      | 0.008   | 28209                     | 61       | 0.22%     | 8034                      | 44       | 0.55%     | 1.79(0.91-3.55)       | 0.093   |
| Hypercholesterolaemia              | 21651                     | 60       | 0.28%     | 6280                      | 47       | 0.75%     | 3.56(1.89-6.71)      | <0.001  | 26855                     | 56       | 0.21%     | 7687                      | 43       | 0.56%     | 2.74(1.61-4.65)       | <0.001  |
| Electrolyte imbalance              | 24786                     | 72       | 0.29%     | 7018                      | 177      | 2.52%     | 12.75(7.89-20.58)    | <0.001  | 29240                     | 64       | 0.22%     | 8202                      | 126      | 1.54%     | 9.32(5.65-15.36)      | <0.001  |
| Dementia                           | 26625                     | 9        | 0.03%     | 7600                      | 20       | 0.26%     | 11.07(2.45-49.94)    | 0.002   | 30810                     | 8        | 0.03%     | 8625                      | 15       | 0.17%     | 16.56(2.58-106.43)    | 0.003   |
| Delirium                           | 26458                     | 22       | 0.08%     | 7515                      | 89       | 1.18%     | 21.98(9.52-50.72)    | <0.001  | 30701                     | 13       | 0.04%     | 8578                      | 50       | 0.58%     | 15.35(5.21-45.28)     | <0.001  |
| Mental disease                     | 21130                     | 64       | 0.30%     | 6323                      | 47       | 0.74%     | 2.31(1.37-3.9)       | 0.002   | 28113                     | 54       | 0.19%     | 7993                      | 33       | 0.41%     | 3.47(1.73-6.95)       | <0.001  |
| Hypertension                       | 16671                     | 113      | 0.68%     | 5018                      | 68       | 1.36%     | 1.32(0.82-2.12)      | 0.253   | 21634                     | 99       | 0.46%     | 6328                      | 74       | 1.17%     | 2.72(1.63-4.55)       | <0.001  |
| Chronic ischaemic heart disease    | 23914                     | 38       | 0.16%     | 7006                      | 23       | 0.33%     | 1.62(0.73-3.62)      | 0.236   | 29064                     | 31       | 0.11%     | 8324                      | 21       | 0.25%     | 2.75(1.07-7.08)       | 0.035   |
| Pulmonary embolism                 | 26372                     | 24       | 0.09%     | 7696                      | 72       | 0.94%     | 9.86(5.06-19.23)     | <0.001  | 30517                     | 19       | 0.06%     | 8695                      | 40       | 0.46%     | 14.89(5.48-40.47)     | <0.001  |
| Other heart disease                | 23244                     | 95       | 0.41%     | 6717                      | 92       | 1.37%     | 4.21(2.71-6.54)      | <0.001  | 27962                     | 65       | 0.23%     | 8005                      | 64       | 0.80%     | 3.59(2.17-5.93)       | <0.001  |
| Cerebrovascular diseases           | 26518                     | 24       | 0.09%     | 7653                      | 17       | 0.22%     | 3.71(1.41-9.74)      | 0.008   | 30677                     | 14       | 0.05%     | 8680                      | 2        | 0.02%     | 1.57(0.25-9.97)       | 0.634   |
| Vascular disease                   | 25911                     | 16       | 0.06%     | 7531                      | 13       | 0.17%     | 2.55(0.89-7.27)      | 0.080   | 30430                     | 6        | 0.02%     | 8662                      | 10       | 0.12%     | 12.01(1.31-110.45)    | 0.028   |
| Hypotension                        | 25698                     | 28       | 0.11%     | 7377                      | 58       | 0.79%     | 14.02(5.91-33.24)    | <0.001  | 29981                     | 29       | 0.10%     | 8490                      | 49       | 0.58%     | 6.45(3.15-13.17)      | <0.001  |
| Lower respiratory infection        | 24099                     | 48       | 0.20%     | 6509                      | 453      | 6.96%     | 56.74(30.89-104.25)  | <0.001  | 28944                     | 36       | 0.12%     | 7882                      | 398      | 5.05%     | 53.63(28.3-101.65)    | <0.001  |
| COPD/Emphysema                     | 25810                     | 15       | 0.06%     | 7420                      | 58       | 0.78%     | 18.05(6.69-48.69)    | <0.001  | 30843                     | 1        | 0.00%     | 8770                      | 14       | 0.16%     | NA                    | 0.997   |
| Asthma                             | 23635                     | 25       | 0.11%     | 6905                      | 25       | 0.36%     | 2.68(1.24-5.78)      | 0.012   | 27527                     | 42       | 0.15%     | 7829                      | 21       | 0.27%     | 1.32(0.64-2.72)       | 0.450   |
| Other lung disease                 | 25696                     | 32       | 0.12%     | 7456                      | 38       | 0.51%     | 3.97(1.85-8.49)      | <0.001  | 30103                     | 27       | 0.09%     | 8550                      | 34       | 0.40%     | 7.88(3.37-18.43)      | <0.001  |
| Pleural effusion                   | 25928                     | 29       | 0.11%     | 7493                      | 28       | 0.37%     | 5.83(2.5-13.62)      | <0.001  | 30238                     | 29       | 0.10%     | 8604                      | 21       | 0.24%     | 3.1(1.34-7.17)        | 0.008   |
| Respiratory failure                | 26579                     | 13       | 0.05%     | 7588                      | 175      | 2.31%     | 115.63(28.94-462.09) | <0.001  | 30866                     | 3        | 0.01%     | 8667                      | 152      | 1.75%     | 244.27(29.59-2016.41) | <0.001  |
| Gastro-oesophageal reflux disease  | 23666                     | 49       | 0.21%     | 6997                      | 36       | 0.51%     | 3.38(1.78-6.41)      | <0.001  | 27974                     | 55       | 0.20%     | 8124                      | 29       | 0.36%     | 1.51(0.84-2.71)       | 0.169   |
| Diverticular disease of intestine  | 25528                     | 39       | 0.15%     | 7468                      | 19       | 0.25%     | 2.09(0.97-4.49)      | 0.058   | 29921                     | 24       | 0.08%     | 8538                      | 19       | 0.22%     | 3.19(1.32-7.73)       | 0.010   |
| Fecal abnormalities                | 24280                     | 50       | 0.21%     | 6969                      | 65       | 0.93%     | 5.93(3.25-10.83)     | <0.001  | 28455                     | 42       | 0.15%     | 8090                      | 39       | 0.48%     | 2.88(1.65-5.03)       | <0.001  |
| Rash and dermatitis                | 26513                     | 6        | 0.02%     | 7720                      | 22       | 0.28%     | 24.88(3.67-168.8)    | 0.001   | 30640                     | 4        | 0.01%     | 8714                      | 18       | 0.21%     | 11.67(2.61-52.17)     | 0.001   |
| Decubitus ulcer                    | 26684                     | 13       | 0.05%     | 7692                      | 43       | 0.56%     | 59.81(6.58-543.51)   | <0.001  | 30852                     | 5        | 0.02%     | 8732                      | 23       | 0.26%     | NA                    | 0.997   |
| Gout                               | 26252                     | 16       | 0.06%     | 7631                      | 12       | 0.16%     | 5.82(1.49-22.67)     | 0.011   | 30550                     | 17       | 0.06%     | 8704                      | 7        | 0.08%     | 2.21(0.62-7.85)       | 0.220   |
| Osteoarthritis                     | 23698                     | 66       | 0.28%     | 6924                      | 56       | 0.81%     | 3.47(2.08-5.78)      | <0.001  | 28025                     | 68       | 0.24%     | 8077                      | 48       | 0.59%     | 2.18(1.3-3.64)        | 0.003   |
| Renal failure                      | 24545                     | 55       | 0.22%     | 6924                      | 139      | 2.01%     | 12.03(7.06-20.48)    | <0.001  | 29056                     | 58       | 0.20%     | 8174                      | 85       | 1.04%     | 6.44(3.83-10.84)      | <0.001  |
| Urinary tract infection            | 24931                     | 37       | 0.15%     | 7096                      | 39       | 0.55%     | 3.47(1.91-6.31)      | <0.001  | 29149                     | 24       | 0.08%     | 8199                      | 28       | 0.34%     | 9.1(3.15-26.33)       | <0.001  |
| Hyperplasia of prostate            | 24878                     | 39       | 0.16%     | 7313                      | 22       | 0.30%     | 2.38(1.21-4.71)      | 0.012   | 29456                     | 33       | 0.11%     | 8448                      | 14       | 0.17%     | 2.13(0.87-5.24)       | 0.100   |
| Arrhythmia                         | 25892                     | 20       | 0.08%     | 7531                      | 27       | 0.36%     | 7.89(3.02-20.62)     | <0.001  | 30093                     | 21       | 0.07%     | 8581                      | 24       | 0.28%     | 4.36(1.86-10.2)       | <0.001  |
| Cough                              | 26256                     | 9        | 0.03%     | 7601                      | 39       | 0.51%     | NA                   | 0.993   | 30443                     | 9        | 0.03%     | 8643                      | 33       | 0.38%     | 12.87(3.9-42.47)      | <0.001  |
| Dyspnea and asphyxia               | 25687                     | 33       | 0.13%     | 7397                      | 60       | 0.81%     | 13.34(5.64-31.55)    | <0.001  | 29889                     | 17       | 0.06%     | 8515                      | 47       | 0.55%     | 11.03(4.37-27.83)     | <0.001  |
| Abnormalities of gait and mobility | 25603                     | 45       | 0.18%     | 7145                      | 58       | 0.81%     | 5.37(2.97-9.72)      | <0.001  | 29945                     | 34       | 0.11%     | 8332                      | 50       | 0.60%     | 6.46(3.13-13.31)      | <0.001  |
| Urinary abnormality                | 23741                     | 40       | 0.17%     | 6887                      | 39       | 0.57%     | 2.89(1.59-5.24)      | <0.001  | 28137                     | 43       | 0.15%     | 8016                      | 38       | 0.47%     | 3.66(2.03-6.58)       | <0.001  |
| Disorientation                     | 26415                     | 22       | 0.08%     | 7577                      | 25       | 0.33%     | 3.29(1.47-7.36)      | 0.004   | 30594                     | 10       | 0.03%     | 8624                      | 22       | 0.26%     | 5.74(1.86-17.68)      | 0.002   |
| Other cognitive symptoms           | 26704                     | 5        | 0.02%     | 7732                      | 11       | 0.14%     | 5(1.03-24.17)        | 0.045   | 30826                     | 6        | 0.02%     | 8744                      | 4        | 0.05%     | NA                    | 0.999   |
| Emotional state symptoms and signs | 26670                     | 6        | 0.02%     | 7756                      | 18       | 0.23%     | 41.61(2.98-582)      | 0.006   | 30841                     | 7        | 0.02%     | 8755                      | 13       | 0.15%     | 18.61(1.71-202.15)    | 0.016   |
| General symptoms and signs         | 23167                     | 68       | 0.29%     | 6659                      | 87       | 1.31%     | 4.71(2.93-7.57)      | <0.001  | 27156                     | 54       | 0.20%     | 7692                      | 74       | 0.96%     | 5.16(2.96-8.99)       | <0.001  |
| Abnormal examing results           | 24784                     | 60       | 0.24%     | 7171                      | 54       | 0.75%     | 3.19(1.92-5.32)      | <0.001  | 29190                     | 34       | 0.12%     | 8347                      | 54       | 0.65%     | 6.72(3.49-12.95)      | <0.001  |

Note: Analyses were adjusted for ethnicity, BMI and CCI. COVID-19: corona virus disease 2019; BMI: body mass index; CCI: Charlson Comorbidity index; COPD: chronic obstructive pulmonary disease; HR: hazards ratio; CI: confidence interval. Bold indicates p values less than 0.05.

**Supplementary Table 12: The adjusted risk of clinical comorbidity in COVID-19-positive participants compared with matched COVID-19-negative participants stratified by CCI score.**

| Comorbidity                        | CCI high                  |          |           |                           |          |           |                      |         | CCI low                   |          |           |                           |          |           |                       |         |
|------------------------------------|---------------------------|----------|-----------|---------------------------|----------|-----------|----------------------|---------|---------------------------|----------|-----------|---------------------------|----------|-----------|-----------------------|---------|
|                                    | COVID-19-negative         |          |           | COVID-19-positive         |          |           | HR (95% CI)          | P value | COVID-19-negative         |          |           | COVID-19-positive         |          |           | HR (95% CI)           | P value |
|                                    | No. negative participants | No. case | Incidence | No. positive participants | No. case | Incidence |                      |         | No. negative participants | No. case | Incidence | No. positive participants | No. case | Incidence |                       |         |
| Gastroenteritis and colitis        | 24329                     | 36       | 0.15%     | 6440                      | 73       | 1.13%     | 7.89(4.26-14.61)     | <0.001  | 31076                     | 16       | 0.05%     | 9523                      | 32       | 0.34%     | 4.92(2.05-11.81)      | <0.001  |
| Septicaemia                        | 25099                     | 23       | 0.09%     | 6510                      | 47       | 0.72%     | 25.45(7.77-83.32)    | <0.001  | 31645                     | 6        | 0.02%     | 9677                      | 19       | 0.20%     | 22.26(2.84-174.35)    | 0.003   |
| Infectious diseases                | 24196                     | 31       | 0.13%     | 6232                      | 61       | 0.98%     | 10.96(5.38-22.3)     | <0.001  | 31204                     | 6        | 0.02%     | 9535                      | 21       | 0.22%     | 7.25(1.66-31.58)      | 0.008   |
| Blood cell disease                 | 22106                     | 68       | 0.31%     | 5834                      | 56       | 0.96%     | 3.1(1.89-5.1)        | <0.001  | 30434                     | 24       | 0.08%     | 9350                      | 22       | 0.24%     | 5.55(2.25-13.72)      | <0.001  |
| Diabetes mellitus                  | 20835                     | 34       | 0.16%     | 5183                      | 25       | 0.48%     | 2.25(0.79-6.43)      | 0.131   | 31808                     | 32       | 0.10%     | 9714                      | 51       | 0.53%     | 5.36(2.51-11.45)      | <0.001  |
| Hypoglycaemia                      | 26049                     | 14       | 0.05%     | 6886                      | 35       | 0.51%     | 12.04(4.3-33.69)     | <0.001  | 31773                     | 2        | 0.01%     | 9709                      | 1        | 0.01%     | NA                    | 1.000   |
| Vitamin deficiency                 | 25464                     | 20       | 0.08%     | 6663                      | 41       | 0.62%     | 8.85(3.89-20.17)     | <0.001  | 31513                     | 13       | 0.04%     | 9639                      | 14       | 0.15%     | 5.17(1.51-17.72)      | 0.009   |
| Obesity                            | 22130                     | 60       | 0.27%     | 5771                      | 45       | 0.78%     | 2.49(1.17-5.32)      | 0.018   | 30307                     | 60       | 0.20%     | 9279                      | 46       | 0.50%     | 0.78(0.4-1.53)        | 0.473   |
| Hypercholesterolaemia              | 19147                     | 57       | 0.30%     | 4923                      | 37       | 0.75%     | 3.07(1.58-5.98)      | <0.001  | 29676                     | 62       | 0.21%     | 9126                      | 55       | 0.60%     | 3.02(1.86-4.92)       | <0.001  |
| Electrolyte imbalance              | 23199                     | 98       | 0.42%     | 5768                      | 214      | 3.71%     | 9.75(6.74-14.11)     | <0.001  | 31194                     | 39       | 0.13%     | 9546                      | 92       | 0.96%     | 7.43(4.35-12.7)       | <0.001  |
| Dementia                           | 26074                     | 11       | 0.04%     | 6651                      | 27       | 0.41%     | 16.71(3.83-73.01)    | <0.001  | 31762                     | 7        | 0.02%     | 9675                      | 8        | 0.08%     | 22.8(1.06-491.66)     | 0.046   |
| Delirium                           | 25840                     | 26       | 0.10%     | 6535                      | 105      | 1.61%     | 16.94(8.48-33.84)    | <0.001  | 31721                     | 9        | 0.03%     | 9662                      | 37       | 0.38%     | 26.11(5.66-120.36)    | <0.001  |
| Mental disease                     | 20361                     | 56       | 0.28%     | 5414                      | 47       | 0.87%     | 3.36(1.72-6.57)      | <0.001  | 29205                     | 62       | 0.21%     | 8987                      | 34       | 0.38%     | 2.05(1.18-3.57)       | 0.011   |
| Sleep apnoea                       | 25134                     | 7        | 0.03%     | 6734                      | 13       | 0.19%     | 10.15(0.99-104.08)   | 0.051   | 31384                     | 11       | 0.04%     | 9602                      | 4        | 0.04%     | NA                    | 0.998   |
| Hearing loss                       | 25385                     | 21       | 0.08%     | 6749                      | 15       | 0.22%     | 3.97(1.46-10.81)     | 0.007   | 31426                     | 13       | 0.04%     | 9636                      | 2        | 0.02%     | 0.24(0.03-2.11)       | 0.197   |
| Hypertension                       | 12327                     | 79       | 0.64%     | 3145                      | 51       | 1.62%     | 2.98(1.37-6.5)       | 0.006   | 26196                     | 139      | 0.53%     | 8259                      | 91       | 1.10%     | 2.31(1.58-3.38)       | <0.001  |
| Chronic ischaemic heart disease    | 21932                     | 50       | 0.23%     | 5797                      | 32       | 0.55%     | 3.13(1.52-6.46)      | 0.002   | 31395                     | 19       | 0.06%     | 9624                      | 12       | 0.12%     | 1.63(0.63-4.2)        | 0.311   |
| Pulmonary embolism                 | 25734                     | 27       | 0.10%     | 6834                      | 67       | 0.98%     | 15.09(6.65-34.23)    | <0.001  | 31555                     | 16       | 0.05%     | 9662                      | 45       | 0.47%     | 11.84(4.35-32.23)     | <0.001  |
| Other heart disease                | 20935                     | 92       | 0.44%     | 5345                      | 91       | 1.70%     | 5.6(3.29-9.54)       | <0.001  | 30616                     | 70       | 0.23%     | 9458                      | 65       | 0.69%     | 4.05(2.44-6.74)       | <0.001  |
| Cerebrovascular diseases           | 25787                     | 20       | 0.08%     | 6720                      | 15       | 0.22%     | 18.06(1.87-174.11)   | 0.012   | 31808                     | 19       | 0.06%     | 9714                      | 4        | 0.04%     | 0.42(0.08-2.21)       | 0.306   |
| Vascular disease                   | 25117                     | 19       | 0.08%     | 6645                      | 16       | 0.24%     | 5.96(1.97-18.08)     | 0.002   | 31617                     | 3        | 0.01%     | 9655                      | 8        | 0.08%     | NA                    | 0.998   |
| Hypotension                        | 24620                     | 39       | 0.16%     | 6357                      | 81       | 1.27%     | 9.94(5.38-18.38)     | <0.001  | 31449                     | 18       | 0.06%     | 9612                      | 26       | 0.27%     | 6.05(2.16-16.96)      | <0.001  |
| Lower respiratory infection        | 22404                     | 62       | 0.28%     | 5157                      | 501      | 9.71%     | 41.85(25.53-68.6)    | <0.001  | 30996                     | 26       | 0.08%     | 9307                      | 356      | 3.83%     | 47.17(25.78-86.3)     | <0.001  |
| COPD/Emphysema                     | 25240                     | 12       | 0.05%     | 6573                      | 60       | 0.91%     | 40.12(8.08-199.06)   | <0.001  | 31808                     | 5        | 0.02%     | 9714                      | 12       | 0.12%     | NA                    | 0.998   |
| Asthma                             | 19703                     | 21       | 0.11%     | 5107                      | 16       | 0.31%     | 3.42(1.19-9.77)      | 0.022   | 31808                     | 46       | 0.14%     | 9714                      | 30       | 0.31%     | 1.71(0.96-3.04)       | 0.070   |
| Other lung disease                 | 24585                     | 42       | 0.17%     | 6447                      | 50       | 0.78%     | 6.08(3.18-11.63)     | <0.001  | 31607                     | 18       | 0.06%     | 9658                      | 23       | 0.24%     | 7.38(2.62-20.8)       | <0.001  |
| Pleural effusion                   | 24993                     | 43       | 0.17%     | 6552                      | 33       | 0.50%     | 3.9(1.98-7.67)       | <0.001  | 31567                     | 18       | 0.06%     | 9642                      | 17       | 0.18%     | 9.09(2.58-31.95)      | <0.001  |
| Respiratory failure                | 26075                     | 12       | 0.05%     | 6704                      | 204      | 3.04%     | 146.96(31.86-677.84) | <0.001  | 31777                     | 5        | 0.02%     | 9654                      | 127      | 1.32%     | 143.95(17.63-1175.14) | <0.001  |
| Gastro-oesophageal reflux disease  | 22069                     | 55       | 0.25%     | 5966                      | 39       | 0.65%     | 4.83(2.42-9.66)      | <0.001  | 29927                     | 50       | 0.17%     | 9244                      | 26       | 0.28%     | 1.46(0.81-2.63)       | 0.208   |
| Diverticular disease of intestine  | 24660                     | 40       | 0.16%     | 6542                      | 28       | 0.43%     | 3.33(1.74-6.35)      | <0.001  | 31177                     | 23       | 0.07%     | 9568                      | 10       | 0.10%     | 4.62(1.15-18.64)      | 0.031   |
| Fecal abnormalities                | 22845                     | 60       | 0.26%     | 5834                      | 70       | 1.20%     | 5.42(3.22-9.12)      | <0.001  | 30253                     | 33       | 0.11%     | 9314                      | 34       | 0.37%     | 2.75(1.51-5.03)       | 0.001   |
| Fatty liver                        | 25585                     | 25       | 0.10%     | 6794                      | 17       | 0.25%     | 4.34(0.98-19.2)      | 0.053   | 31593                     | 18       | 0.06%     | 9646                      | 11       | 0.11%     | 1.01(0.37-2.76)       | 0.984   |
| Cellulitis                         | 25211                     | 11       | 0.04%     | 6582                      | 7        | 0.11%     | 1.22(0.31-4.88)      | 0.778   | 31381                     | 6        | 0.02%     | 9585                      | 5        | 0.05%     | 2.01(0.38-10.54)      | 0.409   |
| Rash and dermatitis                | 25899                     | 8        | 0.03%     | 6867                      | 28       | 0.41%     | 25.01(5.12-122.17)   | <0.001  | 31657                     | 2        | 0.01%     | 9673                      | 12       | 0.12%     | NA                    | 0.996   |
| Decubitus ulcer                    | 26168                     | 18       | 0.07%     | 6836                      | 51       | 0.75%     | 34.44(9.61-123.41)   | <0.001  | 31776                     | 0        | 0.00%     | 9694                      | 15       | 0.15%     | NA                    | 0.999   |
| Gout                               | 25607                     | 21       | 0.08%     | 6790                      | 13       | 0.19%     | 2.86(0.97-8.43)      | 0.057   | 31599                     | 12       | 0.04%     | 9649                      | 6        | 0.06%     | 1.63(0.28-9.31)       | 0.584   |
| Osteoarthritis                     | 21836                     | 71       | 0.33%     | 5734                      | 73       | 1.27%     | 4.92(2.97-8.15)      | <0.001  | 30236                     | 63       | 0.21%     | 9358                      | 32       | 0.34%     | 1.45(0.83-2.53)       | 0.191   |
| Renal failure                      | 22460                     | 77       | 0.34%     | 5576                      | 146      | 2.62%     | 9.48(5.78-15.55)     | <0.001  | 31501                     | 37       | 0.12%     | 9615                      | 84       | 0.87%     | 7.89(4.38-14.2)       | <0.001  |
| Urinary tract infection            | 23587                     | 43       | 0.18%     | 5947                      | 50       | 0.84%     | 5.73(3.11-10.54)     | <0.001  | 30847                     | 18       | 0.06%     | 9442                      | 18       | 0.19%     | 1.9(0.72-5)           | 0.194   |
| Hyperplasia of prostate            | 23953                     | 45       | 0.19%     | 6394                      | 19       | 0.30%     | 1.53(0.74-3.2)       | 0.253   | 30752                     | 28       | 0.09%     | 9468                      | 18       | 0.19%     | 1.56(0.61-4)          | 0.352   |
| Arrhythmia                         | 24997                     | 30       | 0.12%     | 6606                      | 27       | 0.41%     | 7.52(2.77-20.39)     | <0.001  | 31379                     | 12       | 0.04%     | 9607                      | 25       | 0.26%     | 17.66(3.95-79)        | <0.001  |
| Cough                              | 25543                     | 14       | 0.05%     | 6720                      | 38       | 0.57%     | 11.19(4.16-30.11)    | <0.001  | 31553                     | 4        | 0.01%     | 9625                      | 36       | 0.37%     | NA                    | 0.996   |
| Dyspnea and asphyxia               | 24647                     | 40       | 0.16%     | 6437                      | 63       | 0.98%     | 6.17(3.43-11.08)     | <0.001  | 31312                     | 11       | 0.04%     | 9575                      | 46       | 0.48%     | 327.23(8.85-12101.73) | 0.002   |
| Nausea and vomiting                | 23781                     | 36       | 0.15%     | 6325                      | 29       | 0.46%     | 5.07(2.07-12.41)     | <0.001  | 30757                     | 28       | 0.09%     | 9447                      | 14       | 0.15%     | 1.28(0.55-2.96)       | 0.571   |
| Abnormalities of gait and mobility | 24469                     | 50       | 0.20%     | 5969                      | 74       | 1.24%     | 7.63(4.24-13.71)     | <0.001  | 31453                     | 29       | 0.09%     | 9598                      | 34       | 0.35%     | 3.58(1.82-7.06)       | <0.001  |
| Urinary abnormality                | 22333                     | 46       | 0.21%     | 5765                      | 56       | 0.97%     | 7.23(3.83-13.62)     | <0.001  | 29895                     | 37       | 0.12%     | 9231                      | 21       | 0.23%     | 2.01(0.97-4.18)       | 0.062   |
| Disorientation                     | 25734                     | 18       | 0.07%     | 6634                      | 37       | 0.56%     | 17.84(5.84-54.45)    | <0.001  | 31673                     | 14       | 0.04%     | 9663                      | 11       | 0.11%     | 3.11(1.03-9.39)       | 0.044   |
| Other cognitive symptoms           | 26183                     | 10       | 0.04%     | 6882                      | 14       | 0.20%     | 6.75(1.76-25.91)     | 0.005   | 31750                     | 1        | 0.00%     | 9702                      | 1        | 0.01%     | NA                    | 1.000   |
| Emotional state symptoms and signs | 26176                     | 12       | 0.05%     | 6922                      | 25       | 0.36%     | 18.02(3.27-99.23)    | <0.001  | 31742                     | 1        | 0.00%     | 9693                      | 7        | 0.07%     | NA                    | 0.999   |
| General symptoms and signs         | 21009                     | 76       | 0.36%     | 5315                      | 94       | 1.77%     | 6.59(3.94-11.02)     | <0.001  | 29647                     | 48       | 0.16%     | 9118                      | 69       | 0.76%     | 5.43(3.13-9.42)       | <0.001  |
| Abnormal examing results           | 23421                     | 53       | 0.23%     | 6124                      | 66       | 1.08%     | 7.2(3.89-13.31)      | <0.001  | 30938                     | 41       | 0.13%     | 9492                      | 43       | 0.45%     | 2.55(1.46-4.44)       | <0.001  |

Note: Analyses were adjusted for ethnicity, BMI, and smoking status. COVID-19: corona virus disease 2019; CCI: Charlson Comorbidity index; BMI: body mass index; COPD: chronic obstructive pulmonary disease; HR: hazards ratio; CI: confidence interval.

Bold indicates p values less than 0.05.

**Supplementary Table 13: The outcome-wide association analyses evaluating the hazards ratio (HR) for sequelae (defined by three-digit ICD-10 codes) of COVID-19-positive participants compared to matched COVID-19-negative participants.**

| ICD-10 code  | COVID-19-negative         |          | COVID-19-positive         |          | HR(95%CI)        | P value          | ICD-10 disease                                                                                | Category                                  |
|--------------|---------------------------|----------|---------------------------|----------|------------------|------------------|-----------------------------------------------------------------------------------------------|-------------------------------------------|
|              | No. negative participants | No. case | No. positive participants | No. case |                  |                  |                                                                                               |                                           |
| <b>A419</b>  | 56822                     | 141      | 15404                     | 48       | 1.55(1.1-2.18)   | <b>0.012</b>     | <b>Septicaemia, unspecified</b>                                                               | <b>Septicaemia</b>                        |
| <b>B956</b>  | 57490                     | 25       | 15637                     | 12       | 2.13(1.03-4.42)  | <b>0.041</b>     | <b>Staphylococcus aureus as the cause of diseases classified to other chapters</b>            | <b>Infectious diseases</b>                |
| <b>B968</b>  | 56984                     | 29       | 15448                     | 15       | 2.01(1.06-3.81)  | <b>0.032</b>     | <b>Other specified bacterial agents as the cause of diseases classified to other chapters</b> |                                           |
| <b>F050</b>  | 58064                     | 23       | 15707                     | 12       | 2.42(1.17-5)     | <b>0.017</b>     | <b>Delirium not superimposed on dementia, so described</b>                                    | <b>Delirium</b>                           |
| <b>F051</b>  | 58060                     | 37       | 15677                     | 17       | 2.05(1.14-3.69)  | <b>0.017</b>     | <b>Delirium superimposed on dementia</b>                                                      |                                           |
| <b>J128</b>  | 58129                     | 12       | 14475                     | 14       | 6.45(2.69-15.43) | <b>&lt;0.001</b> | <b>Other viral pneumonia</b>                                                                  | <b>Lower respiratory infection</b>        |
| <b>J189</b>  | 56772                     | 107      | 15329                     | 46       | 1.9(1.33-2.73)   | <b>&lt;0.001</b> | <b>Pneumonia, unspecified</b>                                                                 |                                           |
| <b>J841</b>  | 57846                     | 30       | 15704                     | 19       | 2.6(1.43-4.71)   | <b>0.002</b>     | <b>Other interstitial pulmonary diseases with fibrosis</b>                                    | <b>Interstitial pulmonary diseases</b>    |
| <b>J9691</b> | 57987                     | 28       | 15722                     | 14       | 2.04(1.06-3.91)  | <b>0.032</b>     | <b>Respiratory failure unspecified; Type II [hypercapnic]</b>                                 | <b>Respiratory failure</b>                |
| <b>L891</b>  | 57958                     | 64       | 15671                     | 26       | 2.02(1.25-3.26)  | <b>0.004</b>     | <b>Stage II decubitus ulcer</b>                                                               | <b>Decubitus ulcer</b>                    |
| <b>R15</b>   | 57511                     | 48       | 15557                     | 20       | 2.37(1.35-4.16)  | <b>0.003</b>     | <b>Faecal incontinence</b>                                                                    | <b>Fecal abnormalities</b>                |
| <b>R263</b>  | 58001                     | 22       | 15706                     | 15       | 4.17(1.98-8.8)   | <b>&lt;0.001</b> | <b>Immobility</b>                                                                             | <b>Immobility</b>                         |
| <b>R32</b>   | 57190                     | 94       | 15397                     | 33       | 1.88(1.23-2.87)  | <b>0.003</b>     | <b>Unspecified urinary incontinence</b>                                                       | <b>Urinary abnormality</b>                |
| <b>R458</b>  | 57897                     | 25       | 15709                     | 12       | 2.27(1.1-4.68)   | <b>0.027</b>     | <b>Other symptoms and signs involving emotional state</b>                                     | <b>Emotional state symptoms and signs</b> |

ICD-10: international classification of disease 10<sup>th</sup> revision; COVID-19, corona virus disease 2019; CI: confidence interval. Bold indicates p values less than 0.05.



**Supplementary Table 14: Adjusted hazards ratios (HRs) of sequelae of COVID-19-positive participants compared with matched COVID-19-negative participants.**

| Sequelae category  | Sequelae                       | COVID-19-negative         |          |           | COVID-19-positive         |          |           | HR(95% CI)       | P value        |
|--------------------|--------------------------------|---------------------------|----------|-----------|---------------------------|----------|-----------|------------------|----------------|
|                    |                                | No. negative participants | No. case | Incidence | No. positive participants | No. case | Incidence |                  |                |
| Respiratory system | Lower respiratory infection    | 58112                     | 14       | 0.02%     | 14461                     | 15       | 0.10%     | 8.33(2.76-25.08) | < <b>0.001</b> |
|                    | Interstitial pulmonary disease | 57846                     | 30       | 0.05%     | 15704                     | 19       | 0.12%     | 2.4(1.16-4.95)   | <b>0.018</b>   |
| Skin               | Decubitus ulcer                | 57958                     | 64       | 0.11%     | 15671                     | 26       | 0.17%     | 1.96(1.11-3.46)  | <b>0.020</b>   |
| Symptoms           | Fecal abnormalities            | 57511                     | 48       | 0.08%     | 15557                     | 20       | 0.13%     | 2.24(1.21-4.17)  | <b>0.011</b>   |
|                    | Immobility                     | 58001                     | 22       | 0.04%     | 15706                     | 15       | 0.10%     | 4.82(1.86-12.51) | <b>0.001</b>   |
|                    | Urinary incontinence           | 57190                     | 94       | 0.16%     | 15397                     | 33       | 0.21%     | 1.81(1.15-2.85)  | <b>0.010</b>   |

Note: Analyses were adjusted for ethnicity, BMI, smoking status, and CCI score. COVID-19: corona virus disease 2019; BMI: body mass index; CCI: Charlson Comorbidity index; CI: confidence interval; COPD: chronic obstructive pulmonary disease. Bold indicates p values less than 0.05.

**Supplementary Figure 1: Flowchart of the study design.**

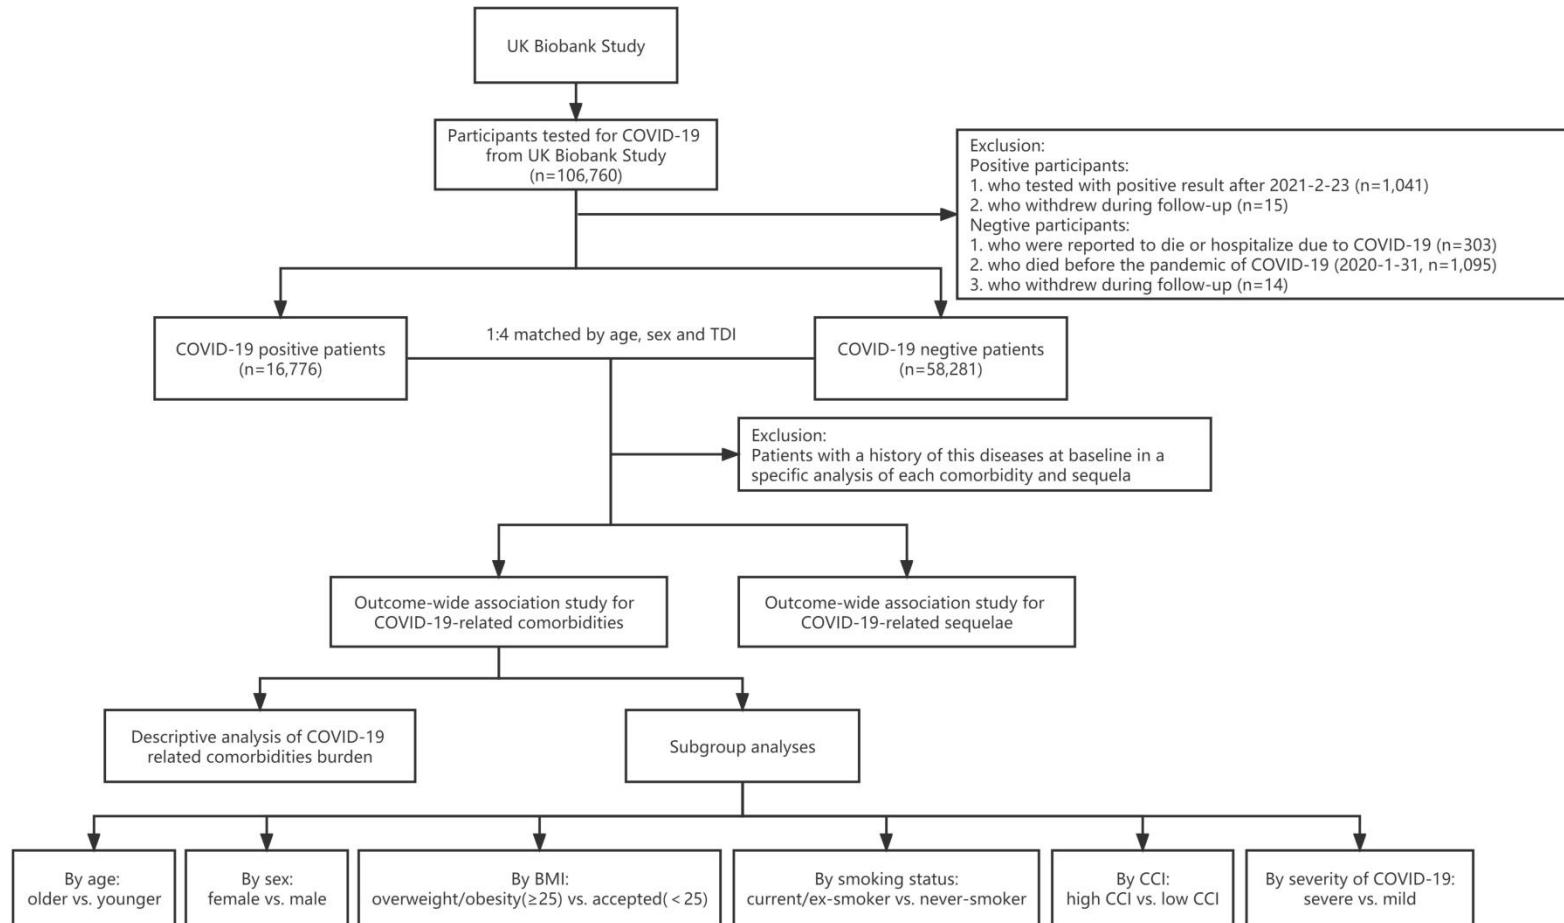

COVID-19: corona virus disease 2019; BMI: body mass index; CCI: Charlson Comorbidity index.

**Supplementary Figure 2: The absolute standardized mean difference in all patients and matched patients.**

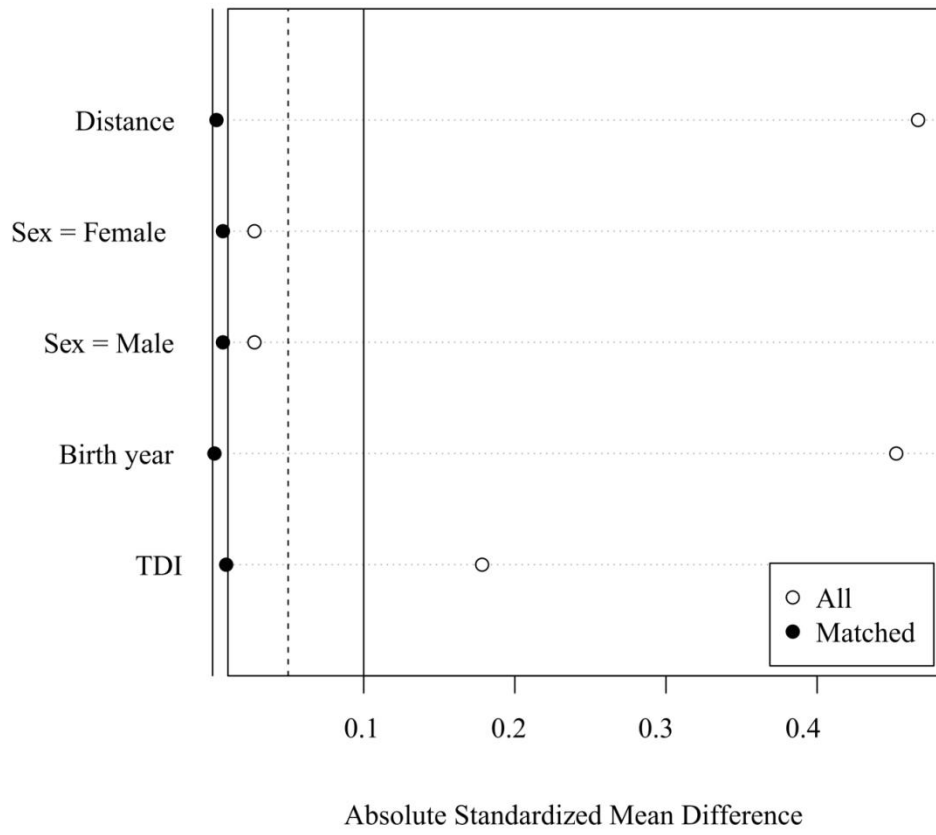

**Supplementary Figure 3: The distribution of (A) all, (B) mild (non-hospitalized), and (C) severe (hospitalized) COVID-19 patients with different numbers of comorbidities, respectively.**

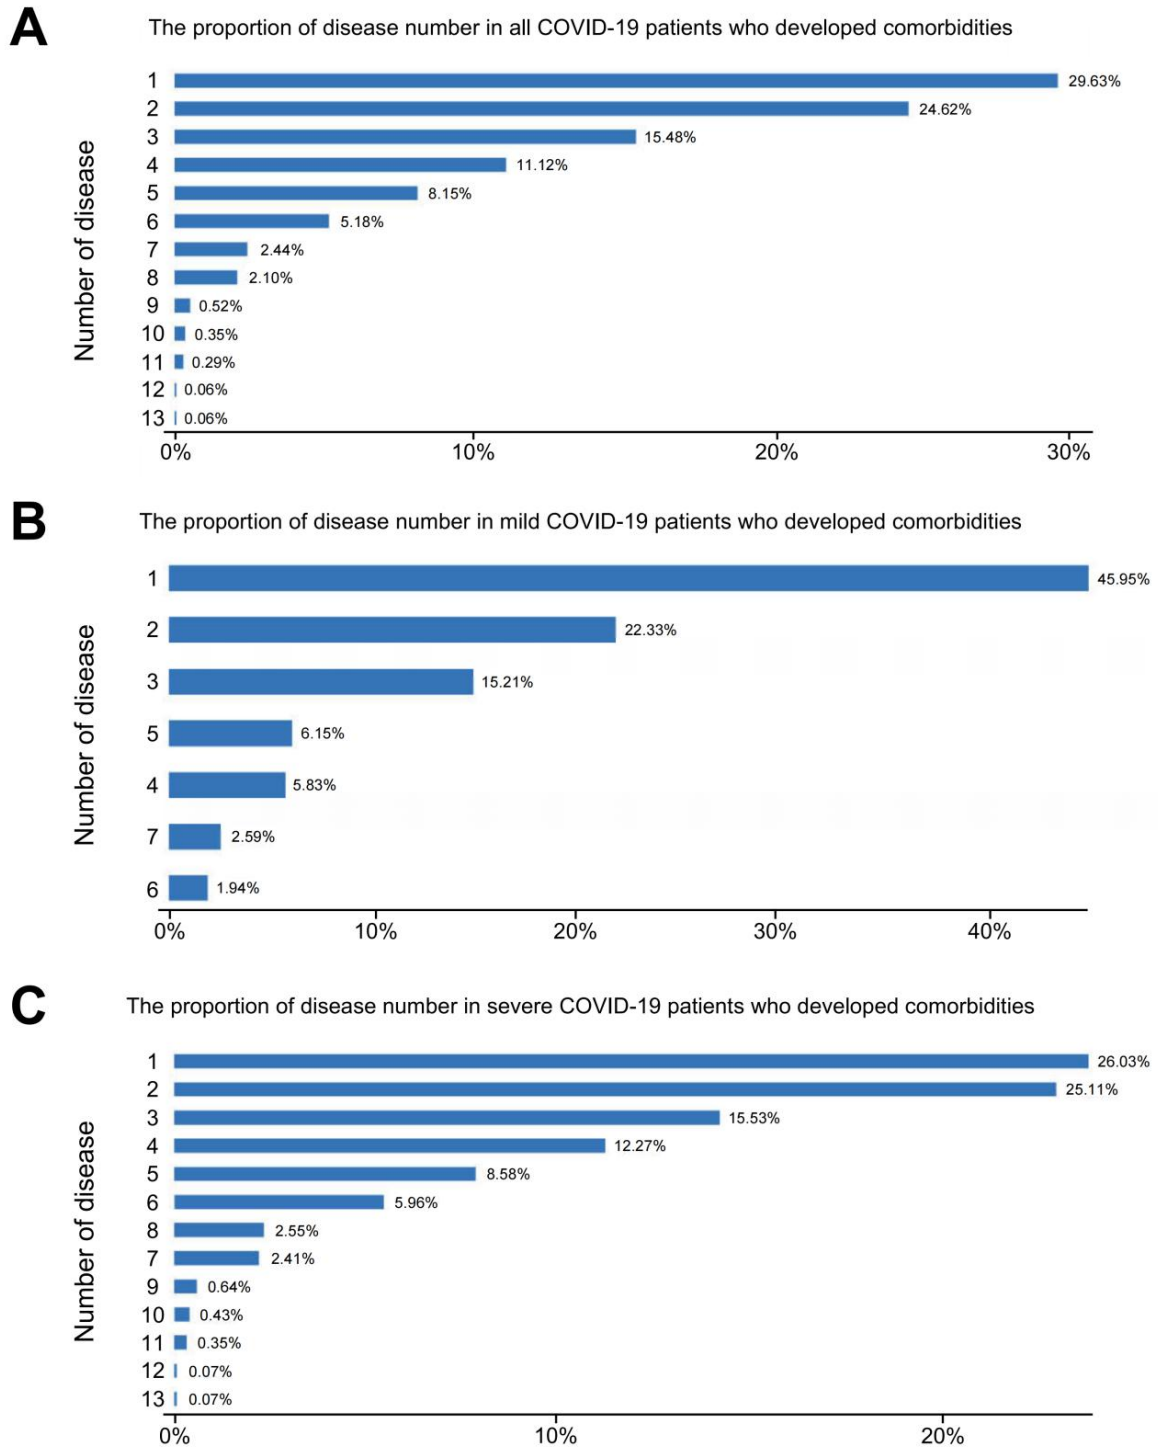

COVID-19: corona virus disease 2019.

**Supplementary Figure 4: The proportion of COVID-19-positive participants with different comorbidities, stratified by age, sex, BMI, smoking status, CCI and severity, respectively.**

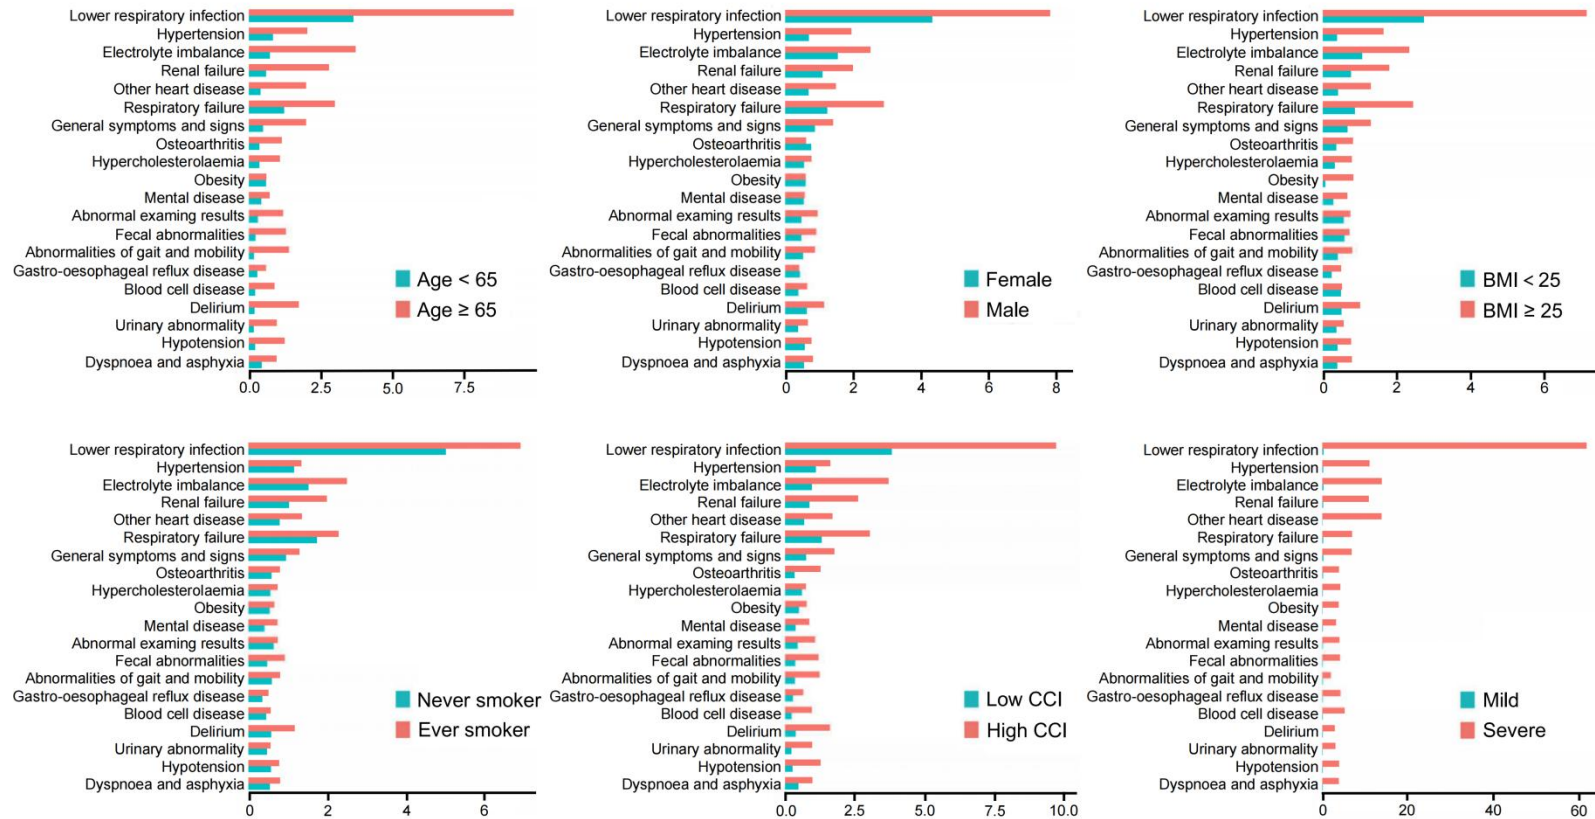

Note: Only the top 20 comorbidities in terms of incidence were shown. COVID-19: corona virus disease 2019; BMI: body mass index; CCI: Charlson Comorbidity index.
